# Supplementary material for: Role of Blood Lipids in the Development of Ischemic Stroke and its Subtypes: A Mendelian Randomization Study
Source: PubMed Central journal article supplement — Stroke. 2018 Mar 26;49(4):820–7. doi: 10.1161/STROKEAHA.117.019653 (PMC5895121; doi:10.1161/strokeaha.117.019653), 2018-03-26
Supplement: str-49-820-s001.pdf [file str-49-820-s001.pdf]

## **SUPPLEMENTAL MATERIAL**

**Supplemental Table I.** Association of 185 lipid-associated single nucleotide polymorphisms with lipid traits in the Global Lipids Genetics Consortium genome-wide association meta-analysis

**Supplemental Table II.** Association of 185 lipid-associated single nucleotide polymorphisms with ischemic stroke subtypes in the Stroke Genetics Network genome-wide association meta-analysis

**Supplemental Table III.** Odds ratio thresholds of ischemic stroke and its subtypes at 80% power

**Supplemental Table IV.** Sensitivity Mendelian randomization analyses of LDL cholesterol with ischemic stroke and its subtypes

**Supplemental Table V.** Sensitivity Mendelian randomization analyses of HDL cholesterol with ischemic stroke and its subtypes

**Supplemental Table VI.** Sensitivity Mendelian randomization analyses of triglycerides with ischemic stroke and subtypes

**Supplemental Figure I.** Mendelian randomization analysis using SNPs in genes encoding targets of LDLC lowering or HDLC rising drugs

**Members of the Stroke Genetics Network (SiGN)**

**References**

**Supplemental Table I.** Association of 185 lipid-associated single nucleotide polymorphisms with lipid traits in the Global Lipids Genetics Consortium genome-wide association meta-analysis.

| SNP        | A1 | A2 | LDL cholesterol |       |           | HDL cholesterol |       |           | Triglycerides |       |           |
|------------|----|----|-----------------|-------|-----------|-----------------|-------|-----------|---------------|-------|-----------|
|            |    |    | beta            | se    | p         | beta            | se    | p         | beta          | se    | p         |
| rs10019888 | G  | A  | 0.018           | 0.005 | 3.23E-04  | -0.027          | 0.005 | 4.90E-08  | 0.023         | 0.005 | 2.28E-06  |
| rs10029254 | T  | C  | 0.006           | 0.004 | 2.05E-01  | -0.009          | 0.004 | 4.87E-02  | 0.027         | 0.004 | 7.55E-09  |
| rs1010167  | G  | C  | 0.025           | 0.004 | 6.22E-11  | -0.004          | 0.004 | 3.96E-01  | 0.002         | 0.004 | 8.08E-01  |
| rs10102164 | A  | G  | 0.032           | 0.005 | 3.74E-11  | -0.001          | 0.004 | 7.97E-01  | 0.011         | 0.004 | 6.87E-03  |
| rs10282707 | C  | T  | 0.008           | 0.004 | 4.23E-02  | 0.025           | 0.004 | 1.03E-11  | -0.009        | 0.003 | 6.52E-03  |
| rs103294   | T  | C  | 0.007           | 0.005 | 1.23E-01  | 0.052           | 0.004 | 4.00E-30  | -0.002        | 0.004 | 7.52E-01  |
| rs1035744  | T  | C  | 0.007           | 0.004 | 1.58E-01  | -0.006          | 0.004 | 1.55E-01  | 0.021         | 0.004 | 1.45E-07  |
| rs10401969 | T  | C  | 0.118           | 0.007 | 2.65E-54  | -0.013          | 0.007 | 1.02E-01  | 0.121         | 0.007 | 9.70E-70  |
| rs10493326 | A  | G  | 0.021           | 0.004 | 1.91E-06  | -0.001          | 0.004 | 6.73E-01  | 0.031         | 0.004 | 2.00E-15  |
| rs10513688 | A  | G  | 0.022           | 0.006 | 2.18E-03  | -0.005          | 0.006 | 6.08E-01  | 0.031         | 0.006 | 1.54E-07  |
| rs10773105 | T  | C  | 0.006           | 0.004 | 1.22E-01  | -0.036          | 0.004 | 3.20E-24  | 0.004         | 0.003 | 5.09E-01  |
| rs10790162 | A  | G  | 0.076           | 0.007 | 1.09E-23  | -0.095          | 0.007 | 9.91E-40  | 0.231         | 0.007 | 1.10E-249 |
| rs10832962 | T  | C  | 0.032           | 0.004 | 6.62E-14  | 0.004           | 0.004 | 3.33E-01  | 0.011         | 0.004 | 5.18E-03  |
| rs10861661 | C  | A  | 0.000           | 0.005 | 9.29E-01  | -0.022          | 0.004 | 5.05E-07  | 0.023         | 0.004 | 2.60E-07  |
| rs10903129 | G  | A  | 0.033           | 0.004 | 3.03E-17  | 0.001           | 0.003 | 8.59E-01  | 0.008         | 0.003 | 5.88E-03  |
| rs11045163 | A  | G  | 0.006           | 0.004 | 1.63E-01  | -0.022          | 0.004 | 3.20E-09  | 0.010         | 0.003 | 2.85E-03  |
| rs11220462 | A  | G  | 0.059           | 0.006 | 6.61E-21  | -0.016          | 0.006 | 8.75E-03  | 0.019         | 0.005 | 1.32E-03  |
| rs11246602 | C  | T  | 0.002           | 0.006 | 5.26E-01  | 0.034           | 0.005 | 1.68E-10  | -0.009        | 0.005 | 1.92E-01  |
| rs11563251 | T  | C  | 0.035           | 0.006 | 4.50E-08  | 0.006           | 0.006 | 3.65E-01  | 0.008         | 0.006 | 8.26E-02  |
| rs11660468 | T  | C  | 0.011           | 0.004 | 3.41E-03  | 0.039           | 0.003 | 3.60E-27  | -0.001        | 0.003 | 8.80E-01  |
| rs1169288  | C  | A  | 0.038           | 0.004 | 6.45E-21  | 0.010           | 0.004 | 9.13E-03  | 0.003         | 0.004 | 4.20E-01  |
| rs1186380  | C  | T  | 0.024           | 0.004 | 8.46E-08  | 0.000           | 0.004 | 8.69E-01  | -0.003        | 0.004 | 5.21E-01  |
| rs12133576 | A  | G  | 0.010           | 0.004 | 3.83E-03  | 0.024           | 0.004 | 6.15E-11  | -0.009        | 0.003 | 1.19E-02  |
| rs12145743 | T  | G  | 0.004           | 0.004 | 3.38E-01  | -0.020          | 0.004 | 1.80E-08  | 0.012         | 0.004 | 5.56E-04  |
| rs12226802 | G  | A  | 0.000           | 0.005 | 6.19E-01  | 0.033           | 0.005 | 1.29E-09  | -0.007        | 0.005 | 2.30E-01  |
| rs1250229  | C  | T  | 0.024           | 0.004 | 3.13E-08  | -0.003          | 0.004 | 4.04E-01  | 0.009         | 0.004 | 1.39E-02  |
| rs12525163 | T  | C  | 0.004           | 0.004 | 2.56E-01  | -0.022          | 0.004 | 1.52E-07  | 0.009         | 0.004 | 3.70E-02  |
| rs1260326  | T  | C  | 0.021           | 0.004 | 1.51E-07  | -0.011          | 0.004 | 1.74E-03  | 0.115         | 0.003 | 2.29E-239 |
| rs12670798 | C  | T  | 0.034           | 0.004 | 4.81E-14  | -0.001          | 0.004 | 7.33E-01  | 0.010         | 0.004 | 1.68E-02  |
| rs12678919 | A  | G  | 0.008           | 0.006 | 5.05E-01  | -0.155          | 0.006 | 1.38E-149 | 0.170         | 0.006 | 1.82E-199 |
| rs12801636 | A  | G  | 0.008           | 0.005 | 1.45E-01  | 0.024           | 0.004 | 3.15E-08  | -0.018        | 0.004 | 1.35E-05  |
| rs13107325 | C  | T  | 0.016           | 0.008 | 5.74E-02  | 0.071           | 0.008 | 1.07E-15  | -0.031        | 0.008 | 3.98E-05  |
| rs13326165 | G  | A  | 0.004           | 0.005 | 2.67E-01  | -0.029          | 0.004 | 9.04E-11  | 0.021         | 0.004 | 2.96E-06  |
| rs1341267  | A  | C  | 0.002           | 0.004 | 8.87E-01  | 0.002           | 0.003 | 8.59E-01  | -0.018        | 0.003 | 8.30E-07  |
| rs1367117  | A  | G  | 0.119           | 0.004 | 9.48E-183 | -0.022          | 0.004 | 7.59E-09  | 0.025         | 0.004 | 1.06E-11  |
| rs1482852  | A  | G  | 0.003           | 0.004 | 5.75E-01  | -0.021          | 0.004 | 6.34E-08  | 0.013         | 0.004 | 3.68E-04  |
| rs1515110  | T  | G  | 0.006           | 0.004 | 9.36E-02  | -0.032          | 0.004 | 8.04E-18  | 0.027         | 0.003 | 8.54E-14  |
| rs1532085  | A  | G  | 0.003           | 0.004 | 6.47E-01  | 0.107           | 0.004 | 1.24E-188 | 0.031         | 0.003 | 2.32E-18  |

|            |   |   |       |       |          |        |       |          |        |       |          |
|------------|---|---|-------|-------|----------|--------|-------|----------|--------|-------|----------|
| rs1535     | A | G | 0.053 | 0.004 | 7.77E-41 | 0.039  | 0.004 | 5.74E-27 | -0.046 | 0.004 | 5.49E-40 |
| rs1564348  | C | T | 0.048 | 0.005 | 2.76E-21 | -0.008 | 0.005 | 1.68E-01 | 0.016  | 0.005 | 4.91E-04 |
| rs16831243 | T | C | 0.038 | 0.006 | 9.06E-12 | 0.011  | 0.005 | 3.90E-02 | -0.001 | 0.005 | 9.87E-01 |
| rs1688030  | C | T | 0.016 | 0.008 | 3.73E-02 | 0.009  | 0.007 | 2.46E-01 | 0.038  | 0.007 | 1.99E-07 |
| rs1689797  | A | C | 0.014 | 0.004 | 4.92E-04 | -0.036 | 0.004 | 2.85E-21 | 0.011  | 0.004 | 2.42E-02 |
| rs16942887 | A | G | 0.001 | 0.005 | 7.98E-01 | 0.083  | 0.005 | 8.28E-54 | -0.012 | 0.005 | 2.96E-02 |
| rs17145738 | T | C | 0.004 | 0.006 | 5.43E-01 | 0.041  | 0.005 | 4.95E-13 | -0.115 | 0.005 | 9.42E-99 |
| rs17173637 | C | T | 0.007 | 0.006 | 3.81E-01 | -0.036 | 0.006 | 1.90E-08 | 0.021  | 0.006 | 1.04E-03 |
| rs17286602 | T | A | 0.003 | 0.004 | 4.24E-01 | -0.021 | 0.003 | 2.93E-07 | 0.006  | 0.003 | 1.62E-01 |
| rs17345563 | A | G | 0.036 | 0.006 | 2.04E-09 | -0.014 | 0.005 | 4.62E-03 | 0.015  | 0.005 | 3.90E-03 |
| rs174532   | A | G | 0.035 | 0.004 | 3.13E-16 | 0.021  | 0.004 | 6.93E-08 | -0.016 | 0.004 | 3.44E-05 |
| rs17508045 | T | C | 0.049 | 0.007 | 4.91E-12 | -0.009 | 0.006 | 4.66E-02 | -0.008 | 0.006 | 4.00E-01 |
| rs17695224 | G | A | 0.011 | 0.004 | 1.25E-02 | 0.029  | 0.004 | 2.42E-13 | -0.012 | 0.004 | 1.13E-02 |
| rs17788930 | A | G | 0.005 | 0.004 | 2.18E-01 | 0.036  | 0.004 | 1.53E-22 | -0.011 | 0.004 | 2.80E-03 |
| rs17789218 | T | C | 0.024 | 0.004 | 3.26E-07 | -0.004 | 0.004 | 1.35E-01 | 0.006  | 0.004 | 6.65E-02 |
| rs1781930  | G | A | 0.010 | 0.005 | 5.70E-02 | 0.002  | 0.005 | 6.25E-01 | 0.031  | 0.004 | 2.51E-11 |
| rs1800562  | G | A | 0.062 | 0.008 | 8.25E-14 | 0.007  | 0.007 | 2.42E-01 | -0.013 | 0.007 | 1.72E-01 |
| rs1800961  | C | T | 0.069 | 0.011 | 6.03E-10 | 0.127  | 0.010 | 1.64E-34 | 0.002  | 0.009 | 7.02E-01 |
| rs181362   | C | T | 0.007 | 0.005 | 7.93E-02 | 0.038  | 0.004 | 9.24E-18 | 0.009  | 0.004 | 2.81E-02 |
| rs1883025  | C | T | 0.030 | 0.004 | 6.14E-11 | 0.070  | 0.004 | 1.50E-65 | 0.022  | 0.004 | 2.91E-07 |
| rs1998013  | C | T | 0.381 | 0.022 | 3.02E-48 | -0.035 | 0.020 | 4.13E-01 | -0.009 | 0.020 | 6.57E-01 |
| rs2000999  | A | G | 0.065 | 0.005 | 4.22E-41 | 0.002  | 0.004 | 9.52E-01 | 0.019  | 0.004 | 7.49E-07 |
| rs2030746  | T | C | 0.021 | 0.004 | 8.61E-09 | -0.003 | 0.004 | 3.06E-01 | 0.003  | 0.004 | 4.91E-01 |
| rs205262   | A | G | 0.009 | 0.004 | 3.13E-02 | 0.028  | 0.004 | 3.88E-13 | -0.003 | 0.004 | 8.03E-01 |
| rs2068888  | G | A | 0.017 | 0.004 | 3.89E-05 | -0.019 | 0.004 | 2.15E-06 | 0.024  | 0.003 | 1.68E-11 |
| rs2073547  | G | A | 0.049 | 0.005 | 1.92E-21 | -0.005 | 0.005 | 3.10E-01 | 0.015  | 0.004 | 3.39E-03 |
| rs217386   | G | A | 0.036 | 0.004 | 1.20E-19 | -0.001 | 0.004 | 4.99E-01 | 0.010  | 0.003 | 6.35E-03 |
| rs2240327  | G | A | 0.001 | 0.004 | 9.71E-01 | 0.024  | 0.003 | 1.11E-11 | -0.002 | 0.003 | 8.67E-01 |
| rs2241210  | G | A | 0.008 | 0.004 | 8.55E-02 | 0.033  | 0.004 | 2.49E-20 | 0.003  | 0.003 | 2.47E-01 |
| rs2247056  | C | T | 0.025 | 0.004 | 1.42E-08 | 0.012  | 0.004 | 3.79E-03 | 0.038  | 0.004 | 3.86E-21 |
| rs2255141  | A | G | 0.030 | 0.004 | 1.32E-13 | 0.034  | 0.004 | 2.35E-17 | -0.021 | 0.004 | 1.70E-09 |
| rs2278236  | A | G | 0.007 | 0.004 | 1.27E-01 | 0.033  | 0.004 | 3.19E-18 | -0.014 | 0.003 | 1.52E-04 |
| rs2287623  | G | A | 0.022 | 0.004 | 5.40E-08 | 0.011  | 0.004 | 2.05E-03 | -0.001 | 0.003 | 9.20E-01 |
| rs2288002  | G | A | 0.029 | 0.004 | 1.26E-12 | 0.007  | 0.004 | 1.21E-01 | 0.009  | 0.003 | 1.69E-03 |
| rs2290547  | A | G | 0.001 | 0.005 | 7.93E-01 | -0.030 | 0.005 | 3.69E-09 | 0.010  | 0.004 | 2.21E-02 |
| rs2293889  | T | G | 0.015 | 0.004 | 2.42E-04 | -0.031 | 0.004 | 4.27E-17 | 0.006  | 0.003 | 1.51E-01 |
| rs2294261  | A | C | 0.033 | 0.004 | 6.57E-17 | -0.009 | 0.004 | 2.06E-02 | 0.002  | 0.003 | 5.87E-01 |
| rs2297374  | C | T | 0.033 | 0.004 | 1.26E-15 | -0.006 | 0.004 | 2.18E-01 | 0.009  | 0.003 | 4.74E-03 |
| rs2303975  | G | A | 0.001 | 0.005 | 9.35E-01 | -0.028 | 0.005 | 1.59E-07 | 0.012  | 0.005 | 2.68E-02 |
| rs2326077  | C | T | 0.034 | 0.004 | 5.00E-17 | 0.004  | 0.004 | 2.18E-01 | 0.018  | 0.003 | 5.35E-07 |
| rs2328223  | C | A | 0.030 | 0.005 | 5.63E-09 | 0.000  | 0.005 | 8.59E-01 | -0.007 | 0.005 | 1.15E-01 |
| rs2412710  | G | A | 0.002 | 0.015 | 6.40E-01 | 0.084  | 0.014 | 1.36E-09 | -0.099 | 0.013 | 1.66E-11 |
| rs2472509  | G | T | 0.000 | 0.004 | 7.08E-01 | 0.023  | 0.004 | 1.21E-09 | -0.002 | 0.004 | 7.22E-01 |

|           |   |   |        |       |          |        |       |          |        |       |           |
|-----------|---|---|--------|-------|----------|--------|-------|----------|--------|-------|-----------|
| rs2587534 | A | G | 0.039  | 0.004 | 8.06E-25 | 0.009  | 0.003 | 3.85E-03 | 0.004  | 0.003 | 2.71E-01  |
| rs2602836 | G | A | 0.001  | 0.004 | 8.31E-01 | -0.019 | 0.003 | 4.96E-08 | 0.009  | 0.003 | 2.12E-02  |
| rs261342  | C | G | 0.003  | 0.007 | 7.36E-01 | -0.107 | 0.006 | 1.47E-68 | -0.045 | 0.006 | 2.53E-12  |
| rs2642438 | G | A | 0.035  | 0.004 | 7.32E-16 | 0.030  | 0.004 | 7.78E-14 | -0.017 | 0.004 | 5.27E-06  |
| rs2652834 | A | G | 0.002  | 0.005 | 7.32E-01 | -0.029 | 0.004 | 3.59E-11 | 0.025  | 0.004 | 1.92E-08  |
| rs267733  | A | G | 0.033  | 0.005 | 5.29E-09 | -0.016 | 0.005 | 3.58E-03 | 0.003  | 0.005 | 6.16E-01  |
| rs2710642 | A | G | 0.024  | 0.004 | 6.09E-09 | -0.010 | 0.004 | 7.69E-03 | 0.007  | 0.003 | 4.71E-02  |
| rs2737252 | G | A | 0.031  | 0.004 | 7.04E-14 | 0.013  | 0.004 | 3.94E-03 | 0.009  | 0.004 | 1.07E-02  |
| rs2923084 | G | A | 0.012  | 0.005 | 1.84E-02 | -0.026 | 0.005 | 5.02E-08 | 0.012  | 0.004 | 5.97E-03  |
| rs2925979 | C | T | 0.003  | 0.004 | 6.30E-01 | 0.035  | 0.004 | 1.32E-19 | -0.021 | 0.004 | 2.14E-07  |
| rs2954022 | C | A | 0.055  | 0.004 | 2.39E-47 | -0.040 | 0.003 | 2.12E-29 | 0.078  | 0.003 | 2.23E-113 |
| rs2980885 | G | A | 0.031  | 0.005 | 6.26E-11 | -0.035 | 0.004 | 1.73E-14 | 0.058  | 0.004 | 3.00E-40  |
| rs314253  | T | C | 0.024  | 0.004 | 3.44E-10 | -0.003 | 0.004 | 3.53E-01 | 0.009  | 0.003 | 2.98E-02  |
| rs3198697 | T | C | 0.010  | 0.004 | 6.86E-03 | 0.016  | 0.004 | 3.28E-05 | -0.020 | 0.003 | 2.21E-08  |
| rs326214  | A | G | 0.007  | 0.005 | 2.04E-01 | -0.061 | 0.005 | 2.17E-36 | 0.024  | 0.004 | 3.79E-07  |
| rs355838  | T | G | 0.018  | 0.004 | 3.05E-05 | -0.019 | 0.004 | 4.10E-07 | 0.014  | 0.003 | 1.21E-04  |
| rs364585  | G | A | 0.025  | 0.004 | 4.28E-10 | 0.001  | 0.004 | 8.22E-01 | -0.002 | 0.003 | 4.40E-01  |
| rs3741414 | C | T | 0.016  | 0.004 | 3.41E-04 | -0.030 | 0.004 | 6.10E-14 | 0.028  | 0.004 | 1.44E-13  |
| rs3761445 | A | G | 0.008  | 0.004 | 3.99E-02 | -0.016 | 0.004 | 3.94E-06 | 0.023  | 0.003 | 8.06E-12  |
| rs3780181 | A | G | 0.045  | 0.007 | 1.76E-09 | 0.004  | 0.007 | 5.42E-01 | -0.007 | 0.007 | 4.91E-01  |
| rs3817588 | T | C | 0.026  | 0.005 | 4.43E-07 | -0.005 | 0.004 | 2.30E-01 | 0.067  | 0.004 | 1.30E-55  |
| rs3822072 | A | G | 0.007  | 0.004 | 3.71E-02 | -0.025 | 0.003 | 4.06E-12 | 0.018  | 0.003 | 5.74E-07  |
| rs38855   | A | G | 0.001  | 0.004 | 9.73E-01 | -0.015 | 0.003 | 9.05E-05 | 0.019  | 0.003 | 2.11E-08  |
| rs3996352 | A | G | 0.005  | 0.004 | 1.21E-01 | -0.030 | 0.003 | 3.59E-17 | 0.018  | 0.003 | 5.88E-08  |
| rs4075205 | C | T | 0.012  | 0.004 | 8.21E-04 | -0.022 | 0.004 | 3.54E-09 | 0.009  | 0.003 | 5.16E-02  |
| rs4148005 | G | T | 0.015  | 0.004 | 1.49E-04 | -0.028 | 0.004 | 5.74E-14 | 0.007  | 0.004 | 4.37E-02  |
| rs4148218 | G | A | 0.044  | 0.005 | 6.76E-21 | -0.003 | 0.004 | 4.56E-01 | 0.004  | 0.004 | 2.95E-01  |
| rs4240624 | A | G | 0.067  | 0.006 | 2.62E-23 | 0.082  | 0.006 | 1.32E-45 | -0.028 | 0.006 | 1.09E-06  |
| rs4332136 | C | G | -0.043 | 0.098 | 6.60E-01 | 0.480  | 0.065 | 1.00E-13 | 0.024  | 0.053 | 6.50E-01  |
| rs442177  | T | G | 0.016  | 0.004 | 6.09E-05 | -0.022 | 0.003 | 2.19E-09 | 0.031  | 0.003 | 1.32E-18  |
| rs4465830 | G | A | 0.009  | 0.005 | 5.99E-02 | -0.060 | 0.004 | 5.18E-40 | 0.053  | 0.004 | 2.98E-34  |
| rs4530754 | A | G | 0.028  | 0.004 | 3.58E-12 | 0.001  | 0.003 | 9.34E-01 | 0.002  | 0.003 | 7.42E-01  |
| rs4587594 | G | A | 0.049  | 0.004 | 1.63E-32 | 0.015  | 0.004 | 1.08E-04 | 0.069  | 0.004 | 3.50E-82  |
| rs4650994 | A | G | 0.003  | 0.004 | 3.38E-01 | -0.021 | 0.003 | 6.70E-09 | 0.002  | 0.003 | 3.98E-01  |
| rs4660293 | G | A | 0.011  | 0.004 | 1.23E-02 | -0.035 | 0.004 | 2.86E-18 | 0.020  | 0.004 | 2.87E-07  |
| rs4722551 | C | T | 0.039  | 0.005 | 3.95E-14 | 0.010  | 0.005 | 2.47E-02 | -0.027 | 0.004 | 1.58E-09  |
| rs4791641 | C | T | 0.020  | 0.004 | 1.31E-07 | 0.004  | 0.003 | 9.51E-02 | -0.003 | 0.003 | 4.59E-01  |
| rs4846914 | G | A | 0.004  | 0.004 | 2.34E-01 | -0.048 | 0.003 | 3.51E-41 | 0.040  | 0.003 | 7.20E-31  |
| rs4871137 | G | T | 0.004  | 0.004 | 2.36E-01 | 0.021  | 0.004 | 1.93E-07 | 0.001  | 0.004 | 6.56E-01  |
| rs4917014 | G | T | 0.005  | 0.004 | 2.46E-01 | 0.022  | 0.004 | 1.03E-08 | -0.001 | 0.004 | 8.87E-01  |
| rs4921914 | C | T | 0.023  | 0.004 | 1.92E-07 | 0.002  | 0.004 | 3.94E-01 | 0.035  | 0.004 | 4.87E-17  |
| rs492571  | T | C | 0.003  | 0.010 | 4.72E-01 | 0.066  | 0.009 | 1.27E-12 | -0.080 | 0.009 | 6.74E-17  |
| rs492602  | G | A | 0.029  | 0.004 | 9.42E-14 | -0.003 | 0.004 | 4.27E-01 | 0.014  | 0.004 | 2.48E-04  |

|           |   |   |       |       |           |        |       |           |        |       |          |
|-----------|---|---|-------|-------|-----------|--------|-------|-----------|--------|-------|----------|
| rs4939883 | C | T | 0.021 | 0.005 | 1.47E-05  | 0.080  | 0.005 | 1.80E-66  | 0.005  | 0.004 | 3.81E-01 |
| rs4942486 | T | C | 0.024 | 0.004 | 2.26E-11  | -0.014 | 0.003 | 1.16E-04  | 0.007  | 0.003 | 2.38E-02 |
| rs4969178 | G | A | 0.011 | 0.004 | 8.20E-03  | 0.026  | 0.004 | 1.53E-12  | -0.018 | 0.003 | 5.70E-06 |
| rs4976033 | A | G | 0.001 | 0.004 | 8.75E-01  | 0.022  | 0.004 | 6.42E-08  | -0.014 | 0.004 | 2.01E-04 |
| rs4983559 | G | A | 0.003 | 0.004 | 5.83E-01  | 0.020  | 0.004 | 9.57E-09  | 0.000  | 0.004 | 9.71E-01 |
| rs499974  | A | C | 0.001 | 0.005 | 8.26E-01  | -0.026 | 0.004 | 1.12E-08  | -0.009 | 0.004 | 5.41E-02 |
| rs515135  | C | T | 0.139 | 0.005 | 1.09E-178 | -0.011 | 0.004 | 9.01E-03  | 0.019  | 0.004 | 1.36E-04 |
| rs5763662 | T | C | 0.077 | 0.012 | 1.19E-08  | 0.033  | 0.011 | 6.37E-03  | 0.000  | 0.011 | 8.88E-01 |
| rs579459  | C | T | 0.067 | 0.005 | 2.42E-44  | 0.015  | 0.004 | 1.68E-03  | -0.014 | 0.004 | 1.08E-03 |
| rs5880    | C | G | 0.047 | 0.010 | 1.59E-06  | -0.307 | 0.009 | 1.37E-233 | 0.048  | 0.009 | 4.71E-08 |
| rs6016381 | T | C | 0.036 | 0.004 | 6.85E-20  | -0.008 | 0.004 | 6.08E-02  | 0.014  | 0.003 | 1.99E-05 |
| rs603446  | C | T | 0.009 | 0.004 | 1.14E-02  | -0.002 | 0.004 | 8.73E-01  | 0.050  | 0.003 | 3.92E-43 |
| rs6065311 | C | T | 0.042 | 0.004 | 1.66E-30  | 0.002  | 0.003 | 4.37E-01  | 0.006  | 0.003 | 2.27E-02 |
| rs634869  | T | C | 0.013 | 0.004 | 8.37E-04  | -0.023 | 0.003 | 1.00E-10  | 0.027  | 0.003 | 1.78E-14 |
| rs6450176 | A | G | 0.010 | 0.004 | 1.18E-02  | -0.025 | 0.004 | 6.88E-10  | 0.019  | 0.004 | 3.61E-07 |
| rs646776  | T | C | 0.160 | 0.004 | 1.63E-272 | -0.034 | 0.004 | 2.72E-15  | 0.003  | 0.004 | 3.73E-01 |
| rs6489818 | A | G | 0.028 | 0.005 | 4.57E-09  | 0.000  | 0.005 | 9.28E-01  | -0.004 | 0.004 | 5.40E-01 |
| rs6511720 | G | T | 0.221 | 0.006 | 3.85E-262 | -0.025 | 0.006 | 6.32E-05  | 0.008  | 0.006 | 1.04E-01 |
| rs653178  | T | C | 0.023 | 0.004 | 3.88E-09  | 0.026  | 0.004 | 1.06E-12  | -0.010 | 0.003 | 2.88E-02 |
| rs6544713 | T | C | 0.081 | 0.004 | 4.84E-83  | -0.003 | 0.004 | 3.88E-01  | 0.013  | 0.004 | 9.60E-04 |
| rs6603981 | T | C | 0.034 | 0.004 | 3.10E-13  | 0.004  | 0.004 | 3.81E-01  | 0.007  | 0.004 | 1.74E-01 |
| rs6680658 | G | A | 0.006 | 0.005 | 2.18E-01  | -0.023 | 0.004 | 7.49E-08  | 0.017  | 0.004 | 1.44E-05 |
| rs6805251 | T | C | 0.012 | 0.004 | 1.86E-03  | 0.020  | 0.004 | 1.33E-08  | -0.001 | 0.003 | 9.94E-01 |
| rs6831256 | G | A | 0.019 | 0.004 | 9.07E-07  | -0.013 | 0.004 | 2.97E-03  | 0.026  | 0.004 | 1.60E-12 |
| rs6859    | A | G | 0.084 | 0.004 | 4.65E-88  | -0.018 | 0.004 | 7.73E-06  | 0.014  | 0.004 | 8.10E-05 |
| rs686030  | A | C | 0.009 | 0.005 | 2.36E-01  | 0.055  | 0.005 | 4.29E-27  | 0.025  | 0.005 | 2.23E-07 |
| rs687339  | T | C | 0.011 | 0.005 | 9.97E-03  | -0.032 | 0.004 | 7.11E-13  | 0.029  | 0.004 | 2.51E-12 |
| rs688     | T | C | 0.054 | 0.004 | 1.01E-43  | -0.011 | 0.003 | 1.55E-03  | 0.004  | 0.003 | 2.18E-01 |
| rs6882076 | C | T | 0.046 | 0.004 | 3.31E-31  | 0.002  | 0.004 | 6.85E-01  | 0.029  | 0.004 | 1.51E-15 |
| rs702485  | G | A | 0.001 | 0.004 | 7.87E-01  | 0.024  | 0.003 | 6.45E-12  | -0.002 | 0.003 | 4.75E-01 |
| rs7033354 | C | T | 0.019 | 0.004 | 1.42E-06  | -0.015 | 0.004 | 6.54E-05  | 0.019  | 0.003 | 4.44E-07 |
| rs7117842 | C | T | 0.019 | 0.004 | 7.56E-07  | 0.027  | 0.004 | 1.06E-14  | -0.002 | 0.003 | 5.43E-01 |
| rs7225700 | C | T | 0.030 | 0.004 | 3.56E-13  | 0.010  | 0.004 | 2.35E-02  | -0.005 | 0.004 | 2.36E-01 |
| rs7254892 | G | A | 0.485 | 0.012 | 0.00E+00  | -0.053 | 0.011 | 4.17E-05  | -0.124 | 0.011 | 1.40E-24 |
| rs7264396 | C | T | 0.025 | 0.005 | 4.41E-08  | 0.005  | 0.004 | 6.02E-02  | 0.011  | 0.004 | 2.58E-03 |
| rs731839  | A | G | 0.002 | 0.004 | 5.17E-01  | 0.022  | 0.004 | 3.44E-09  | -0.022 | 0.004 | 2.65E-09 |
| rs7422339 | A | C | 0.008 | 0.004 | 1.42E-01  | -0.027 | 0.004 | 8.73E-10  | 0.000  | 0.004 | 8.60E-01 |
| rs749671  | G | A | 0.015 | 0.004 | 1.05E-04  | -0.007 | 0.004 | 9.57E-02  | 0.021  | 0.003 | 6.11E-10 |
| rs7607980 | T | C | 0.007 | 0.006 | 2.88E-01  | -0.045 | 0.005 | 1.81E-15  | 0.036  | 0.005 | 2.41E-12 |
| rs7640978 | C | T | 0.039 | 0.007 | 9.84E-09  | 0.000  | 0.006 | 7.22E-01  | 0.018  | 0.006 | 5.54E-03 |
| rs7703051 | A | C | 0.073 | 0.004 | 1.40E-77  | 0.002  | 0.004 | 4.21E-01  | 0.006  | 0.003 | 1.63E-01 |
| rs7832643 | T | G | 0.034 | 0.004 | 2.67E-17  | -0.001 | 0.004 | 5.95E-01  | 0.002  | 0.003 | 4.72E-01 |
| rs7897379 | C | T | 0.010 | 0.004 | 4.07E-03  | 0.019  | 0.003 | 1.31E-08  | -0.027 | 0.003 | 1.27E-17 |

|           |   |   |       |       |          |        |       |          |        |       |          |
|-----------|---|---|-------|-------|----------|--------|-------|----------|--------|-------|----------|
| rs799160  | T | C | 0.005 | 0.004 | 2.86E-01 | -0.013 | 0.004 | 2.94E-04 | 0.040  | 0.004 | 5.46E-30 |
| rs8017377 | A | G | 0.030 | 0.004 | 2.52E-15 | -0.004 | 0.004 | 4.34E-01 | 0.006  | 0.004 | 1.42E-01 |
| rs8077889 | C | A | 0.001 | 0.005 | 9.15E-01 | -0.021 | 0.004 | 1.50E-06 | 0.025  | 0.004 | 9.88E-09 |
| rs8176720 | T | C | 0.033 | 0.004 | 1.59E-17 | 0.001  | 0.004 | 9.43E-01 | -0.007 | 0.004 | 6.09E-02 |
| rs838876  | G | A | 0.003 | 0.004 | 4.42E-01 | -0.049 | 0.004 | 7.33E-33 | 0.005  | 0.004 | 3.77E-01 |
| rs868943  | G | A | 0.026 | 0.004 | 8.44E-11 | 0.008  | 0.004 | 3.55E-02 | 0.014  | 0.003 | 3.18E-04 |
| rs894210  | G | A | 0.007 | 0.004 | 1.22E-01 | -0.069 | 0.003 | 1.68E-84 | 0.067  | 0.003 | 2.94E-89 |
| rs903319  | C | T | 0.027 | 0.004 | 5.22E-11 | 0.010  | 0.004 | 1.22E-02 | -0.005 | 0.004 | 1.38E-01 |
| rs931992  | T | G | 0.002 | 0.006 | 7.03E-01 | 0.029  | 0.005 | 4.20E-07 | -0.009 | 0.005 | 1.33E-01 |
| rs9491696 | G | C | 0.006 | 0.004 | 2.64E-01 | -0.020 | 0.003 | 5.21E-10 | 0.018  | 0.003 | 4.87E-07 |
| rs952044  | C | T | 0.003 | 0.004 | 5.79E-01 | 0.023  | 0.004 | 1.19E-08 | -0.010 | 0.004 | 2.45E-03 |
| rs9686661 | T | C | 0.018 | 0.005 | 5.29E-04 | -0.028 | 0.004 | 1.37E-08 | 0.038  | 0.004 | 2.54E-16 |
| rs9693857 | C | T | 0.005 | 0.004 | 2.98E-01 | 0.004  | 0.004 | 5.27E-01 | -0.020 | 0.003 | 1.69E-08 |
| rs970548  | C | A | 0.016 | 0.004 | 6.65E-04 | 0.026  | 0.004 | 1.71E-10 | 0.003  | 0.004 | 4.59E-01 |
| rs9875338 | G | A | 0.027 | 0.004 | 2.21E-11 | 0.007  | 0.004 | 2.10E-02 | 0.014  | 0.003 | 1.62E-05 |
| rs9930333 | T | G | 0.000 | 0.004 | 7.18E-01 | 0.020  | 0.004 | 2.07E-08 | -0.021 | 0.004 | 3.25E-08 |
| rs998584  | A | C | 0.001 | 0.004 | 9.36E-01 | -0.026 | 0.004 | 2.27E-11 | 0.029  | 0.004 | 3.42E-15 |
| rs9989419 | A | G | 0.028 | 0.004 | 2.49E-12 | -0.147 | 0.004 | 0.00E+00 | 0.024  | 0.004 | 1.05E-11 |

Reference: Global Lipids Genetics Consortium<sup>1</sup>

**Supplemental Table II.** Association of 185 lipid-associated single nucleotide polymorphisms with ischemic stroke subtypes in the Stroke Genetics Network genome-wide association meta-analysis.

| SNP        | A1 | A2 | Ischemic Stroke |       |       | Large Artery Atherosclerosis |       |       | Small Artery Occlusion |       |       | Cardio-embolic |       |       |
|------------|----|----|-----------------|-------|-------|------------------------------|-------|-------|------------------------|-------|-------|----------------|-------|-------|
|            |    |    | beta            | se    | p     | beta                         | se    | p     | beta                   | se    | p     | beta           | se    | p     |
| rs10019888 | G  | A  | 0.007           | 0.020 | 0.735 | -0.002                       | 0.044 | 0.962 | 0.032                  | 0.038 | 0.398 | -0.003         | 0.037 | 0.942 |
| rs10029254 | T  | C  | 0.001           | 0.019 | 0.972 | -0.007                       | 0.040 | 0.857 | -0.015                 | 0.037 | 0.689 | -0.002         | 0.034 | 0.950 |
| rs1010167  | G  | C  | 0.026           | 0.016 | 0.095 | 0.001                        | 0.034 | 0.981 | -0.026                 | 0.030 | 0.381 | 0.024          | 0.029 | 0.405 |
| rs10102164 | A  | G  | 0.035           | 0.019 | 0.069 | 0.040                        | 0.042 | 0.343 | -0.002                 | 0.037 | 0.964 | 0.010          | 0.036 | 0.773 |
| rs10282707 | C  | T  | -0.016          | 0.015 | 0.294 | 0.037                        | 0.034 | 0.268 | -0.017                 | 0.030 | 0.554 | -0.033         | 0.028 | 0.243 |
| rs103294   | T  | C  | 0.023           | 0.019 | 0.237 | 0.010                        | 0.042 | 0.819 | 0.026                  | 0.037 | 0.474 | 0.036          | 0.035 | 0.304 |
| rs1035744  | T  | C  | 0.013           | 0.017 | 0.417 | -0.025                       | 0.037 | 0.503 | 0.000                  | 0.032 | 0.992 | 0.012          | 0.031 | 0.695 |
| rs10401969 | T  | C  | 0.013           | 0.026 | 0.613 | -0.053                       | 0.060 | 0.376 | -0.024                 | 0.050 | 0.631 | 0.067          | 0.052 | 0.197 |
| rs10493326 | A  | G  | -0.017          | 0.018 | 0.348 | -0.023                       | 0.038 | 0.550 | -0.056                 | 0.035 | 0.113 | -0.004         | 0.032 | 0.899 |
| rs10513688 | A  | G  | 0.005           | 0.024 | 0.833 | 0.014                        | 0.053 | 0.787 | -0.008                 | 0.046 | 0.870 | 0.091          | 0.043 | 0.034 |
| rs10773105 | T  | C  | 0.014           | 0.016 | 0.372 | 0.028                        | 0.035 | 0.423 | 0.025                  | 0.031 | 0.409 | -0.009         | 0.029 | 0.751 |
| rs10790162 | A  | G  | -0.006          | 0.030 | 0.836 | -0.005                       | 0.066 | 0.943 | 0.042                  | 0.056 | 0.449 | 0.060          | 0.054 | 0.266 |
| rs10832962 | T  | C  | -0.017          | 0.017 | 0.323 | -0.028                       | 0.037 | 0.449 | -0.008                 | 0.033 | 0.800 | -0.013         | 0.031 | 0.673 |
| rs10861661 | C  | A  | 0.000           | 0.017 | 0.981 | 0.021                        | 0.039 | 0.594 | 0.019                  | 0.033 | 0.581 | 0.008          | 0.033 | 0.817 |
| rs10903129 | G  | A  | -0.021          | 0.015 | 0.160 | -0.007                       | 0.033 | 0.831 | -0.019                 | 0.029 | 0.511 | -0.076         | 0.028 | 0.006 |
| rs11045163 | A  | G  | 0.001           | 0.015 | 0.925 | 0.007                        | 0.034 | 0.826 | -0.005                 | 0.029 | 0.867 | -0.005         | 0.028 | 0.854 |
| rs11220462 | A  | G  | -0.038          | 0.023 | 0.092 | 0.050                        | 0.048 | 0.298 | -0.050                 | 0.045 | 0.264 | -0.122         | 0.043 | 0.004 |
| rs11246602 | C  | T  | 0.040           | 0.024 | 0.095 | -0.016                       | 0.052 | 0.762 | 0.008                  | 0.047 | 0.861 | 0.060          | 0.044 | 0.172 |
| rs11563251 | T  | C  | 0.021           | 0.023 | 0.355 | 0.099                        | 0.050 | 0.049 | -0.035                 | 0.044 | 0.424 | -0.020         | 0.044 | 0.645 |
| rs11660468 | T  | C  | 0.017           | 0.016 | 0.288 | 0.089                        | 0.033 | 0.008 | 0.042                  | 0.030 | 0.165 | -0.036         | 0.028 | 0.205 |
| rs1169288  | C  | A  | 0.027           | 0.017 | 0.103 | -0.015                       | 0.036 | 0.684 | 0.082                  | 0.032 | 0.009 | 0.033          | 0.030 | 0.272 |
| rs1186380  | C  | T  | 0.011           | 0.018 | 0.536 | 0.019                        | 0.039 | 0.621 | -0.004                 | 0.036 | 0.922 | 0.031          | 0.032 | 0.335 |
| rs12133576 | A  | G  | -0.028          | 0.016 | 0.074 | -0.058                       | 0.035 | 0.094 | -0.045                 | 0.030 | 0.141 | -0.009         | 0.029 | 0.760 |
| rs12145743 | T  | G  | 0.000           | 0.016 | 0.994 | 0.003                        | 0.035 | 0.925 | 0.040                  | 0.032 | 0.213 | 0.019          | 0.030 | 0.529 |
| rs12226802 | G  | A  | 0.044           | 0.024 | 0.068 | -0.008                       | 0.053 | 0.875 | 0.031                  | 0.047 | 0.503 | 0.050          | 0.044 | 0.257 |
| rs1250229  | C  | T  | -0.026          | 0.018 | 0.139 | -0.020                       | 0.038 | 0.602 | -0.040                 | 0.035 | 0.257 | -0.022         | 0.032 | 0.490 |
| rs12525163 | T  | C  | 0.008           | 0.017 | 0.627 | -0.016                       | 0.037 | 0.666 | -0.008                 | 0.032 | 0.809 | -0.013         | 0.031 | 0.668 |
| rs1260326  | T  | C  | 0.011           | 0.016 | 0.484 | 0.007                        | 0.034 | 0.826 | 0.014                  | 0.030 | 0.647 | -0.009         | 0.028 | 0.764 |
| rs12670798 | C  | T  | -0.013          | 0.018 | 0.458 | -0.006                       | 0.039 | 0.887 | -0.002                 | 0.033 | 0.954 | -0.003         | 0.033 | 0.934 |
| rs12678919 | A  | G  | -0.014          | 0.025 | 0.573 | -0.063                       | 0.053 | 0.233 | 0.058                  | 0.048 | 0.227 | -0.029         | 0.045 | 0.517 |
| rs12801636 | A  | G  | -0.024          | 0.018 | 0.182 | -0.131                       | 0.040 | 0.001 | -0.003                 | 0.033 | 0.936 | 0.010          | 0.033 | 0.764 |
| rs13107325 | C  | T  | -0.013          | 0.030 | 0.665 | -0.016                       | 0.064 | 0.798 | -0.013                 | 0.059 | 0.819 | -0.024         | 0.053 | 0.647 |
| rs13326165 | G  | A  | -0.008          | 0.019 | 0.657 | -0.062                       | 0.041 | 0.126 | -0.007                 | 0.036 | 0.849 | 0.007          | 0.035 | 0.851 |
| rs1341267  | A  | C  | 0.008           | 0.016 | 0.639 | 0.030                        | 0.035 | 0.381 | 0.008                  | 0.033 | 0.806 | 0.029          | 0.029 | 0.321 |
| rs1367117  | A  | G  | -0.007          | 0.017 | 0.680 | 0.022                        | 0.036 | 0.551 | -0.032                 | 0.033 | 0.330 | -0.019         | 0.031 | 0.542 |
| rs1482852  | A  | G  | 0.008           | 0.015 | 0.588 | 0.021                        | 0.034 | 0.533 | 0.022                  | 0.029 | 0.458 | -0.019         | 0.028 | 0.513 |
| rs1515110  | T  | G  | 0.017           | 0.016 | 0.284 | 0.040                        | 0.034 | 0.248 | 0.044                  | 0.030 | 0.146 | 0.023          | 0.029 | 0.422 |
| rs1532085  | A  | G  | -0.003          | 0.015 | 0.852 | 0.077                        | 0.034 | 0.021 | 0.003                  | 0.029 | 0.919 | -0.029         | 0.028 | 0.308 |

|            |   |   |        |       |       |        |       |       |        |       |       |        |       |       |
|------------|---|---|--------|-------|-------|--------|-------|-------|--------|-------|-------|--------|-------|-------|
| rs1535     | A | G | 0.022  | 0.016 | 0.184 | 0.102  | 0.036 | 0.005 | -0.019 | 0.031 | 0.550 | 0.011  | 0.030 | 0.706 |
| rs1564348  | C | T | -0.013 | 0.021 | 0.524 | 0.084  | 0.044 | 0.060 | -0.019 | 0.040 | 0.638 | 0.004  | 0.039 | 0.921 |
| rs16831243 | T | C | -0.024 | 0.024 | 0.316 | -0.031 | 0.053 | 0.554 | -0.039 | 0.045 | 0.382 | -0.053 | 0.044 | 0.229 |
| rs1688030  | C | T | 0.027  | 0.028 | 0.341 | 0.000  | 0.064 | 0.998 | 0.071  | 0.054 | 0.186 | 0.006  | 0.054 | 0.916 |
| rs1689797  | A | C | -0.013 | 0.016 | 0.424 | 0.020  | 0.035 | 0.556 | -0.004 | 0.031 | 0.885 | 0.010  | 0.029 | 0.727 |
| rs16942887 | A | G | -0.012 | 0.022 | 0.590 | 0.065  | 0.047 | 0.168 | -0.003 | 0.041 | 0.946 | -0.061 | 0.041 | 0.138 |
| rs17145738 | T | C | -0.043 | 0.024 | 0.074 | -0.009 | 0.052 | 0.866 | -0.001 | 0.047 | 0.980 | -0.017 | 0.045 | 0.711 |
| rs17173637 | C | T | -0.001 | 0.026 | 0.965 | -0.029 | 0.058 | 0.617 | 0.007  | 0.052 | 0.887 | 0.017  | 0.048 | 0.715 |
| rs17286602 | T | A | 0.020  | 0.015 | 0.192 | 0.049  | 0.033 | 0.140 | 0.010  | 0.029 | 0.748 | 0.010  | 0.028 | 0.722 |
| rs17345563 | A | G | -0.006 | 0.024 | 0.804 | -0.044 | 0.052 | 0.401 | -0.019 | 0.048 | 0.694 | -0.060 | 0.044 | 0.174 |
| rs174532   | A | G | 0.006  | 0.017 | 0.732 | 0.041  | 0.037 | 0.261 | 0.013  | 0.034 | 0.700 | -0.009 | 0.031 | 0.763 |
| rs17508045 | T | C | 0.045  | 0.029 | 0.116 | 0.070  | 0.062 | 0.263 | 0.050  | 0.057 | 0.385 | 0.074  | 0.053 | 0.157 |
| rs17695224 | G | A | -0.025 | 0.017 | 0.146 | -0.056 | 0.037 | 0.131 | -0.012 | 0.033 | 0.707 | -0.031 | 0.031 | 0.326 |
| rs17788930 | A | G | -0.008 | 0.016 | 0.639 | 0.022  | 0.035 | 0.527 | -0.064 | 0.031 | 0.039 | -0.017 | 0.030 | 0.573 |
| rs17789218 | T | C | -0.002 | 0.019 | 0.928 | -0.062 | 0.041 | 0.124 | 0.005  | 0.037 | 0.895 | -0.051 | 0.034 | 0.134 |
| rs1781930  | G | A | -0.015 | 0.021 | 0.480 | 0.009  | 0.045 | 0.843 | 0.004  | 0.041 | 0.921 | -0.029 | 0.038 | 0.452 |
| rs1800562  | G | A | 0.001  | 0.035 | 0.971 | 0.122  | 0.077 | 0.111 | 0.010  | 0.071 | 0.885 | -0.117 | 0.061 | 0.054 |
| rs1800961  | C | T | -0.027 | 0.046 | 0.553 | 0.008  | 0.101 | 0.936 | 0.029  | 0.089 | 0.747 | -0.151 | 0.082 | 0.066 |
| rs181362   | C | T | -0.025 | 0.018 | 0.165 | -0.067 | 0.040 | 0.098 | -0.038 | 0.034 | 0.256 | -0.034 | 0.034 | 0.314 |
| rs1883025  | C | T | 0.000  | 0.017 | 0.992 | -0.021 | 0.037 | 0.572 | -0.048 | 0.032 | 0.133 | -0.035 | 0.031 | 0.268 |
| rs1998013  | C | T | NA     | NA    | NA    |
| rs2000999  | A | G | 0.027  | 0.019 | 0.156 | -0.017 | 0.042 | 0.692 | -0.031 | 0.038 | 0.412 | 0.029  | 0.035 | 0.404 |
| rs2030746  | T | C | 0.020  | 0.015 | 0.194 | 0.008  | 0.033 | 0.811 | 0.037  | 0.029 | 0.208 | 0.008  | 0.028 | 0.787 |
| rs205262   | A | G | -0.020 | 0.016 | 0.223 | -0.072 | 0.036 | 0.048 | -0.010 | 0.032 | 0.755 | -0.018 | 0.030 | 0.548 |
| rs2068888  | G | A | 0.027  | 0.015 | 0.076 | 0.038  | 0.033 | 0.250 | -0.016 | 0.029 | 0.572 | 0.050  | 0.028 | 0.076 |
| rs2073547  | G | A | 0.014  | 0.019 | 0.459 | 0.069  | 0.041 | 0.094 | 0.083  | 0.035 | 0.018 | -0.045 | 0.036 | 0.207 |
| rs217386   | G | A | 0.023  | 0.016 | 0.137 | 0.062  | 0.034 | 0.071 | 0.052  | 0.031 | 0.089 | -0.025 | 0.028 | 0.381 |
| rs2240327  | G | A | -0.011 | 0.015 | 0.463 | -0.020 | 0.033 | 0.545 | -0.018 | 0.029 | 0.527 | 0.018  | 0.028 | 0.510 |
| rs2241210  | G | A | 0.010  | 0.015 | 0.492 | 0.035  | 0.033 | 0.288 | -0.006 | 0.029 | 0.845 | 0.000  | 0.028 | 0.998 |
| rs2247056  | C | T | 0.011  | 0.018 | 0.558 | 0.032  | 0.039 | 0.410 | -0.004 | 0.035 | 0.917 | 0.014  | 0.033 | 0.666 |
| rs2255141  | A | G | 0.016  | 0.017 | 0.341 | 0.000  | 0.037 | 0.999 | 0.043  | 0.033 | 0.188 | 0.011  | 0.031 | 0.730 |
| rs2278236  | A | G | -0.004 | 0.015 | 0.768 | -0.005 | 0.033 | 0.890 | -0.012 | 0.029 | 0.664 | 0.033  | 0.027 | 0.235 |
| rs2287623  | G | A | 0.017  | 0.015 | 0.253 | 0.039  | 0.033 | 0.246 | -0.012 | 0.029 | 0.671 | 0.065  | 0.028 | 0.021 |
| rs2288002  | G | A | 0.021  | 0.015 | 0.170 | 0.053  | 0.033 | 0.110 | -0.005 | 0.029 | 0.865 | 0.022  | 0.028 | 0.432 |
| rs2290547  | A | G | 0.035  | 0.021 | 0.095 | 0.013  | 0.045 | 0.782 | 0.023  | 0.041 | 0.573 | 0.074  | 0.038 | 0.049 |
| rs2293889  | T | G | -0.018 | 0.016 | 0.241 | -0.038 | 0.034 | 0.268 | -0.033 | 0.031 | 0.277 | -0.008 | 0.028 | 0.792 |
| rs2294261  | A | C | -0.005 | 0.015 | 0.727 | -0.012 | 0.033 | 0.712 | -0.006 | 0.030 | 0.835 | -0.021 | 0.028 | 0.465 |
| rs2297374  | C | T | -0.014 | 0.015 | 0.354 | 0.022  | 0.034 | 0.507 | -0.023 | 0.029 | 0.437 | -0.012 | 0.028 | 0.671 |
| rs2303975  | G | A | 0.012  | 0.023 | 0.598 | -0.006 | 0.051 | 0.910 | 0.058  | 0.045 | 0.195 | -0.023 | 0.043 | 0.595 |
| rs2326077  | C | T | 0.003  | 0.016 | 0.830 | -0.103 | 0.035 | 0.003 | 0.003  | 0.031 | 0.925 | -0.010 | 0.029 | 0.738 |
| rs2328223  | C | A | 0.011  | 0.019 | 0.551 | 0.020  | 0.042 | 0.638 | 0.014  | 0.037 | 0.701 | 0.069  | 0.035 | 0.046 |
| rs2412710  | G | A | -0.006 | 0.045 | 0.889 | -0.069 | 0.102 | 0.496 | -0.037 | 0.083 | 0.660 | -0.018 | 0.085 | 0.836 |
| rs2472509  | G | T | 0.000  | 0.016 | 0.979 | -0.012 | 0.036 | 0.739 | 0.014  | 0.031 | 0.650 | 0.030  | 0.030 | 0.313 |



|           |   |   |        |       |       |        |       |       |        |       |       |        |       |       |
|-----------|---|---|--------|-------|-------|--------|-------|-------|--------|-------|-------|--------|-------|-------|
| rs2587534 | A | G | 0.006  | 0.015 | 0.699 | 0.003  | 0.034 | 0.930 | 0.004  | 0.030 | 0.891 | -0.003 | 0.028 | 0.925 |
| rs2602836 | G | A | 0.006  | 0.015 | 0.711 | -0.057 | 0.033 | 0.085 | 0.061  | 0.029 | 0.037 | -0.024 | 0.028 | 0.386 |
| rs261342  | C | G | 0.020  | 0.018 | 0.258 | 0.068  | 0.040 | 0.093 | 0.022  | 0.034 | 0.509 | -0.015 | 0.033 | 0.646 |
| rs2642438 | G | A | -0.017 | 0.017 | 0.331 | -0.032 | 0.037 | 0.398 | -0.050 | 0.034 | 0.139 | -0.028 | 0.031 | 0.371 |
| rs2652834 | A | G | 0.013  | 0.018 | 0.476 | 0.062  | 0.040 | 0.120 | 0.009  | 0.035 | 0.797 | 0.026  | 0.034 | 0.443 |
| rs267733  | A | G | 0.005  | 0.022 | 0.801 | -0.085 | 0.045 | 0.060 | 0.100  | 0.044 | 0.022 | 0.025  | 0.040 | 0.522 |
| rs2710642 | A | G | 0.013  | 0.016 | 0.432 | -0.011 | 0.035 | 0.755 | 0.006  | 0.031 | 0.843 | 0.068  | 0.030 | 0.021 |
| rs2737252 | G | A | 0.019  | 0.017 | 0.260 | 0.047  | 0.038 | 0.213 | -0.013 | 0.033 | 0.705 | 0.036  | 0.032 | 0.255 |
| rs2923084 | G | A | 0.019  | 0.019 | 0.299 | 0.075  | 0.041 | 0.068 | 0.011  | 0.035 | 0.742 | 0.026  | 0.035 | 0.466 |
| rs2925979 | C | T | -0.024 | 0.016 | 0.136 | -0.056 | 0.036 | 0.119 | -0.019 | 0.032 | 0.548 | -0.010 | 0.030 | 0.741 |
| rs2954022 | C | A | 0.003  | 0.015 | 0.860 | 0.015  | 0.033 | 0.652 | -0.003 | 0.029 | 0.909 | 0.008  | 0.028 | 0.765 |
| rs2980885 | G | A | -0.003 | 0.018 | 0.849 | 0.017  | 0.040 | 0.670 | -0.016 | 0.035 | 0.655 | 0.002  | 0.033 | 0.960 |
| rs314253  | T | C | -0.005 | 0.016 | 0.778 | 0.018  | 0.035 | 0.616 | 0.008  | 0.031 | 0.807 | -0.050 | 0.030 | 0.093 |
| rs3198697 | T | C | 0.001  | 0.016 | 0.930 | -0.020 | 0.034 | 0.563 | 0.031  | 0.031 | 0.318 | 0.062  | 0.029 | 0.030 |
| rs326214  | A | G | -0.014 | 0.016 | 0.397 | 0.010  | 0.036 | 0.786 | -0.029 | 0.031 | 0.347 | -0.058 | 0.030 | 0.054 |
| rs355838  | T | G | 0.005  | 0.016 | 0.779 | 0.084  | 0.034 | 0.013 | 0.034  | 0.031 | 0.270 | -0.010 | 0.029 | 0.741 |
| rs364585  | G | A | -0.008 | 0.016 | 0.625 | -0.040 | 0.034 | 0.243 | 0.014  | 0.031 | 0.642 | -0.015 | 0.029 | 0.604 |
| rs3741414 | C | T | -0.028 | 0.019 | 0.138 | -0.040 | 0.041 | 0.321 | 0.004  | 0.039 | 0.910 | -0.039 | 0.034 | 0.255 |
| rs3761445 | A | G | 0.025  | 0.016 | 0.112 | 0.018  | 0.034 | 0.591 | 0.028  | 0.031 | 0.368 | -0.025 | 0.028 | 0.381 |
| rs3780181 | A | G | 0.041  | 0.027 | 0.138 | 0.061  | 0.063 | 0.340 | 0.039  | 0.050 | 0.440 | -0.005 | 0.053 | 0.928 |
| rs3817588 | T | C | -0.010 | 0.020 | 0.642 | -0.013 | 0.044 | 0.761 | -0.032 | 0.040 | 0.420 | 0.005  | 0.037 | 0.888 |
| rs3822072 | A | G | 0.027  | 0.015 | 0.070 | 0.110  | 0.033 | 0.001 | -0.007 | 0.029 | 0.813 | 0.021  | 0.028 | 0.453 |
| rs38855   | A | G | -0.007 | 0.015 | 0.657 | -0.034 | 0.033 | 0.301 | 0.002  | 0.029 | 0.960 | -0.055 | 0.028 | 0.051 |
| rs3996352 | A | G | -0.009 | 0.015 | 0.551 | -0.019 | 0.033 | 0.571 | 0.015  | 0.029 | 0.609 | -0.007 | 0.028 | 0.810 |
| rs4075205 | C | T | -0.016 | 0.015 | 0.298 | -0.058 | 0.033 | 0.082 | -0.024 | 0.029 | 0.408 | -0.022 | 0.028 | 0.432 |
| rs4148005 | G | T | 0.006  | 0.016 | 0.690 | 0.002  | 0.035 | 0.957 | -0.019 | 0.031 | 0.542 | -0.037 | 0.030 | 0.216 |
| rs4148218 | G | A | 0.014  | 0.019 | 0.449 | -0.013 | 0.042 | 0.759 | -0.026 | 0.035 | 0.456 | 0.028  | 0.035 | 0.432 |
| rs4240624 | A | G | -0.073 | 0.025 | 0.003 | -0.063 | 0.057 | 0.269 | -0.069 | 0.046 | 0.135 | -0.101 | 0.048 | 0.035 |
| rs4332136 | C | G | 0.062  | 0.075 | 0.404 | 0.374  | 0.218 | 0.087 | -0.072 | 0.106 | 0.496 | 0.347  | 0.212 | 0.102 |
| rs442177  | T | G | -0.018 | 0.015 | 0.233 | -0.029 | 0.033 | 0.384 | -0.073 | 0.029 | 0.013 | 0.060  | 0.028 | 0.032 |
| rs4465830 | G | A | -0.013 | 0.020 | 0.506 | -0.022 | 0.043 | 0.615 | 0.029  | 0.039 | 0.459 | -0.009 | 0.036 | 0.811 |
| rs4530754 | A | G | -0.020 | 0.015 | 0.188 | -0.044 | 0.033 | 0.190 | -0.071 | 0.029 | 0.016 | -0.007 | 0.028 | 0.801 |
| rs4587594 | G | A | -0.024 | 0.016 | 0.130 | -0.072 | 0.034 | 0.038 | -0.034 | 0.030 | 0.255 | -0.029 | 0.029 | 0.328 |
| rs4650994 | A | G | -0.019 | 0.015 | 0.204 | -0.014 | 0.033 | 0.663 | -0.006 | 0.029 | 0.828 | -0.040 | 0.028 | 0.150 |
| rs4660293 | G | A | 0.023  | 0.019 | 0.224 | -0.009 | 0.040 | 0.823 | 0.039  | 0.038 | 0.307 | 0.054  | 0.033 | 0.106 |
| rs4722551 | C | T | 0.056  | 0.022 | 0.009 | 0.039  | 0.047 | 0.402 | 0.081  | 0.041 | 0.050 | -0.006 | 0.040 | 0.880 |
| rs4791641 | C | T | -0.003 | 0.015 | 0.860 | -0.057 | 0.033 | 0.089 | -0.025 | 0.030 | 0.399 | -0.016 | 0.028 | 0.564 |
| rs4846914 | G | A | -0.018 | 0.016 | 0.265 | 0.045  | 0.034 | 0.186 | -0.031 | 0.031 | 0.318 | -0.005 | 0.029 | 0.874 |
| rs4871137 | G | T | 0.002  | 0.016 | 0.915 | -0.020 | 0.035 | 0.568 | 0.039  | 0.031 | 0.202 | 0.016  | 0.029 | 0.597 |
| rs4917014 | G | T | -0.040 | 0.016 | 0.014 | -0.023 | 0.036 | 0.519 | -0.059 | 0.032 | 0.064 | -0.057 | 0.030 | 0.058 |
| rs4921914 | C | T | 0.013  | 0.017 | 0.470 | 0.019  | 0.039 | 0.631 | 0.029  | 0.033 | 0.376 | 0.013  | 0.033 | 0.701 |
| rs492571  | T | C | -0.019 | 0.031 | 0.548 | 0.010  | 0.074 | 0.893 | -0.065 | 0.058 | 0.264 | -0.006 | 0.060 | 0.923 |
| rs492602  | G | A | 0.004  | 0.015 | 0.787 | 0.032  | 0.033 | 0.330 | 0.003  | 0.029 | 0.916 | -0.010 | 0.028 | 0.733 |

|           |   |   |        |       |       |        |       |       |        |       |       |        |       |       |
|-----------|---|---|--------|-------|-------|--------|-------|-------|--------|-------|-------|--------|-------|-------|
| rs4939883 | C | T | -0.016 | 0.019 | 0.392 | 0.018  | 0.043 | 0.676 | -0.047 | 0.037 | 0.198 | -0.022 | 0.036 | 0.543 |
| rs4942486 | T | C | -0.022 | 0.015 | 0.130 | -0.061 | 0.033 | 0.064 | -0.010 | 0.029 | 0.738 | -0.074 | 0.028 | 0.007 |
| rs4969178 | G | A | -0.012 | 0.015 | 0.442 | -0.028 | 0.034 | 0.400 | -0.001 | 0.030 | 0.987 | 0.011  | 0.028 | 0.711 |
| rs4976033 | A | G | -0.003 | 0.016 | 0.840 | -0.026 | 0.034 | 0.445 | 0.021  | 0.030 | 0.495 | 0.025  | 0.029 | 0.385 |
| rs4983559 | G | A | 0.008  | 0.017 | 0.639 | -0.011 | 0.037 | 0.770 | 0.045  | 0.031 | 0.151 | -0.036 | 0.031 | 0.238 |
| rs499974  | A | C | 0.041  | 0.019 | 0.035 | 0.082  | 0.042 | 0.051 | 0.120  | 0.036 | 0.001 | -0.026 | 0.036 | 0.478 |
| rs515135  | C | T | 0.041  | 0.019 | 0.031 | -0.024 | 0.042 | 0.573 | 0.080  | 0.038 | 0.036 | 0.059  | 0.036 | 0.100 |
| rs5763662 | T | C | -0.034 | 0.054 | 0.528 | -0.006 | 0.116 | 0.961 | 0.029  | 0.112 | 0.796 | 0.148  | 0.092 | 0.107 |
| rs579459  | C | T | 0.052  | 0.018 | 0.004 | 0.053  | 0.039 | 0.183 | 0.031  | 0.036 | 0.390 | 0.093  | 0.033 | 0.005 |
| rs5880    | C | G | 0.071  | 0.037 | 0.054 | 0.116  | 0.080 | 0.147 | 0.074  | 0.070 | 0.293 | 0.038  | 0.069 | 0.579 |
| rs6016381 | T | C | -0.025 | 0.016 | 0.108 | 0.039  | 0.035 | 0.270 | -0.025 | 0.031 | 0.424 | -0.070 | 0.029 | 0.015 |
| rs603446  | C | T | -0.021 | 0.016 | 0.186 | 0.028  | 0.034 | 0.407 | -0.026 | 0.030 | 0.384 | -0.032 | 0.028 | 0.265 |
| rs6065311 | C | T | 0.031  | 0.015 | 0.040 | 0.087  | 0.033 | 0.008 | 0.023  | 0.029 | 0.435 | 0.005  | 0.028 | 0.847 |
| rs634869  | T | C | 0.015  | 0.015 | 0.311 | 0.086  | 0.034 | 0.010 | 0.018  | 0.029 | 0.548 | 0.007  | 0.028 | 0.812 |
| rs6450176 | A | G | 0.007  | 0.017 | 0.684 | 0.013  | 0.037 | 0.730 | 0.023  | 0.032 | 0.486 | -0.018 | 0.032 | 0.582 |
| rs646776  | T | C | 0.025  | 0.018 | 0.150 | 0.070  | 0.039 | 0.072 | 0.022  | 0.034 | 0.507 | 0.016  | 0.033 | 0.624 |
| rs6489818 | A | G | -0.076 | 0.019 | 0.000 | -0.070 | 0.044 | 0.110 | -0.115 | 0.036 | 0.002 | -0.055 | 0.036 | 0.124 |
| rs6511720 | G | T | 0.044  | 0.024 | 0.065 | 0.094  | 0.053 | 0.078 | 0.007  | 0.045 | 0.883 | 0.045  | 0.044 | 0.301 |
| rs653178  | T | C | -0.104 | 0.016 | 0.000 | -0.109 | 0.034 | 0.001 | -0.159 | 0.031 | 0.000 | -0.062 | 0.029 | 0.030 |
| rs6544713 | T | C | 0.010  | 0.017 | 0.560 | 0.041  | 0.037 | 0.271 | -0.010 | 0.034 | 0.766 | -0.033 | 0.031 | 0.294 |
| rs6603981 | T | C | -0.006 | 0.019 | 0.763 | 0.007  | 0.041 | 0.864 | 0.014  | 0.038 | 0.717 | -0.018 | 0.035 | 0.606 |
| rs6680658 | G | A | -0.009 | 0.018 | 0.605 | 0.027  | 0.040 | 0.496 | -0.003 | 0.035 | 0.944 | -0.046 | 0.033 | 0.155 |
| rs6805251 | T | C | -0.016 | 0.016 | 0.326 | -0.010 | 0.035 | 0.777 | 0.038  | 0.033 | 0.251 | -0.051 | 0.029 | 0.084 |
| rs6831256 | G | A | -0.003 | 0.015 | 0.840 | 0.012  | 0.033 | 0.715 | 0.000  | 0.029 | 0.999 | -0.024 | 0.028 | 0.384 |
| rs6859    | A | G | 0.005  | 0.015 | 0.732 | 0.060  | 0.034 | 0.075 | 0.021  | 0.030 | 0.469 | -0.021 | 0.028 | 0.452 |
| rs686030  | A | C | 0.018  | 0.022 | 0.417 | -0.042 | 0.046 | 0.359 | 0.022  | 0.043 | 0.607 | 0.038  | 0.040 | 0.333 |
| rs687339  | T | C | -0.020 | 0.018 | 0.256 | -0.068 | 0.038 | 0.077 | -0.012 | 0.034 | 0.734 | -0.009 | 0.033 | 0.772 |
| rs688     | T | C | 0.033  | 0.016 | 0.034 | 0.043  | 0.034 | 0.201 | 0.091  | 0.030 | 0.002 | 0.009  | 0.028 | 0.759 |
| rs6882076 | C | T | 0.001  | 0.016 | 0.930 | 0.041  | 0.034 | 0.233 | 0.019  | 0.030 | 0.524 | -0.002 | 0.029 | 0.950 |
| rs702485  | G | A | -0.004 | 0.015 | 0.790 | 0.002  | 0.033 | 0.959 | 0.012  | 0.030 | 0.685 | 0.005  | 0.028 | 0.868 |
| rs7033354 | C | T | 0.014  | 0.016 | 0.373 | -0.003 | 0.035 | 0.929 | -0.019 | 0.030 | 0.530 | 0.092  | 0.029 | 0.001 |
| rs7117842 | C | T | 0.016  | 0.016 | 0.293 | 0.027  | 0.034 | 0.429 | 0.026  | 0.030 | 0.382 | -0.001 | 0.029 | 0.978 |
| rs7225700 | C | T | 0.029  | 0.016 | 0.060 | 0.028  | 0.034 | 0.420 | 0.038  | 0.030 | 0.209 | 0.018  | 0.029 | 0.526 |
| rs7254892 | G | A | 0.067  | 0.038 | 0.075 | 0.102  | 0.090 | 0.255 | 0.050  | 0.073 | 0.489 | -0.029 | 0.070 | 0.684 |
| rs7264396 | C | T | -0.017 | 0.017 | 0.329 | 0.035  | 0.039 | 0.372 | -0.013 | 0.033 | 0.688 | -0.045 | 0.032 | 0.162 |
| rs731839  | A | G | -0.027 | 0.016 | 0.090 | -0.092 | 0.034 | 0.007 | -0.040 | 0.030 | 0.184 | -0.028 | 0.029 | 0.346 |
| rs7422339 | A | C | NA     | NA    | NA    |
| rs749671  | G | A | 0.007  | 0.016 | 0.648 | 0.031  | 0.035 | 0.374 | -0.032 | 0.031 | 0.292 | -0.034 | 0.029 | 0.246 |
| rs7607980 | T | C | -0.020 | 0.022 | 0.366 | 0.017  | 0.049 | 0.729 | -0.028 | 0.042 | 0.499 | -0.029 | 0.040 | 0.465 |
| rs7640978 | C | T | 0.018  | 0.024 | 0.451 | -0.077 | 0.055 | 0.159 | -0.021 | 0.045 | 0.647 | 0.058  | 0.047 | 0.215 |
| rs7703051 | A | C | 0.016  | 0.015 | 0.294 | -0.014 | 0.034 | 0.686 | 0.063  | 0.029 | 0.031 | 0.029  | 0.028 | 0.307 |
| rs7832643 | T | G | 0.009  | 0.015 | 0.577 | 0.054  | 0.034 | 0.110 | -0.023 | 0.030 | 0.438 | 0.018  | 0.028 | 0.535 |
| rs7897379 | C | T | 0.007  | 0.015 | 0.657 | 0.046  | 0.033 | 0.162 | -0.067 | 0.029 | 0.021 | 0.045  | 0.027 | 0.097 |

|           |   |   |        |       |       |        |       |       |        |       |       |        |       |       |
|-----------|---|---|--------|-------|-------|--------|-------|-------|--------|-------|-------|--------|-------|-------|
| rs799160  | T | C | 0.023  | 0.015 | 0.126 | 0.033  | 0.033 | 0.317 | 0.002  | 0.029 | 0.952 | 0.053  | 0.028 | 0.058 |
| rs8017377 | A | G | -0.007 | 0.015 | 0.635 | 0.011  | 0.033 | 0.731 | 0.024  | 0.030 | 0.421 | -0.063 | 0.028 | 0.024 |
| rs8077889 | C | A | -0.013 | 0.018 | 0.488 | 0.033  | 0.040 | 0.402 | 0.021  | 0.035 | 0.544 | 0.011  | 0.033 | 0.733 |
| rs8176720 | T | C | 0.018  | 0.016 | 0.258 | -0.019 | 0.034 | 0.574 | -0.009 | 0.030 | 0.752 | 0.084  | 0.029 | 0.004 |
| rs838876  | G | A | 0.002  | 0.016 | 0.881 | -0.020 | 0.035 | 0.577 | 0.001  | 0.031 | 0.987 | 0.031  | 0.030 | 0.297 |
| rs868943  | G | A | 0.007  | 0.015 | 0.654 | -0.030 | 0.033 | 0.361 | 0.007  | 0.029 | 0.811 | -0.006 | 0.028 | 0.836 |
| rs894210  | G | A | -0.007 | 0.016 | 0.639 | -0.010 | 0.034 | 0.762 | 0.000  | 0.030 | 0.993 | -0.020 | 0.028 | 0.473 |
| rs903319  | C | T | -0.043 | 0.018 | 0.015 | -0.005 | 0.038 | 0.901 | 0.003  | 0.035 | 0.934 | -0.079 | 0.033 | 0.017 |
| rs931992  | T | G | -0.023 | 0.016 | 0.144 | -0.030 | 0.035 | 0.386 | -0.031 | 0.031 | 0.317 | -0.030 | 0.029 | 0.295 |
| rs9491696 | G | C | 0.015  | 0.015 | 0.312 | 0.061  | 0.033 | 0.062 | -0.031 | 0.029 | 0.278 | 0.035  | 0.027 | 0.203 |
| rs952044  | C | T | -0.023 | 0.016 | 0.140 | -0.032 | 0.035 | 0.355 | -0.059 | 0.030 | 0.049 | -0.008 | 0.029 | 0.785 |
| rs9686661 | T | C | 0.030  | 0.019 | 0.114 | 0.013  | 0.042 | 0.765 | -0.001 | 0.036 | 0.986 | 0.036  | 0.035 | 0.309 |
| rs9693857 | C | T | 0.002  | 0.015 | 0.897 | -0.003 | 0.033 | 0.936 | 0.033  | 0.029 | 0.260 | -0.025 | 0.028 | 0.371 |
| rs970548  | C | A | 0.002  | 0.017 | 0.904 | 0.018  | 0.038 | 0.633 | -0.052 | 0.034 | 0.119 | 0.044  | 0.032 | 0.169 |
| rs9875338 | G | A | 0.001  | 0.015 | 0.951 | 0.007  | 0.034 | 0.826 | -0.003 | 0.029 | 0.910 | -0.004 | 0.028 | 0.874 |
| rs9930333 | T | G | -0.011 | 0.015 | 0.464 | -0.056 | 0.033 | 0.091 | 0.017  | 0.029 | 0.559 | -0.007 | 0.028 | 0.805 |
| rs998584  | A | C | 0.014  | 0.016 | 0.372 | 0.011  | 0.035 | 0.747 | 0.074  | 0.032 | 0.021 | -0.005 | 0.029 | 0.874 |
| rs9989419 | A | G | 0.002  | 0.016 | 0.892 | 0.004  | 0.035 | 0.912 | 0.034  | 0.031 | 0.277 | 0.019  | 0.029 | 0.506 |

Reference: NINDS Stroke Genetics Network<sup>2</sup>

**Supplemental Table III.** Odds ratios thresholds of ischemic stroke and subtypes at 80% power.

| Instrument        | N SNPs | Variance explained | Odds Ratio at 80% Power |          |          |          |          |          |          |          |
|-------------------|--------|--------------------|-------------------------|----------|----------|----------|----------|----------|----------|----------|
|                   |        |                    | IS                      |          | LAA      |          | SAO      |          | CE       |          |
|                   |        |                    | positive                | negative | positive | negative | positive | negative | positive | negative |
| LDL cholesterol   |        |                    |                         |          |          |          |          |          |          |          |
| GWAS threshold*   | 75     | 6.4                | 1.109                   | 0.902    | 1.236    | 0.809    | 1.210    | 0.826    | 1.203    | 0.831    |
| Steiger filter 1† | 67     | 5.9                | 1.114                   | 0.898    | 1.246    | 0.803    | 1.217    | 0.822    | 1.210    | 0.826    |
| Steiger filter 2‡ | 61     | 5.6                | 1.117                   | 0.895    | 1.253    | 0.798    | 1.225    | 0.816    | 1.216    | 0.822    |
| GWAS restricted§  | 56     | 3.6                | 1.148                   | 0.871    | 1.316    | 0.760    | 1.280    | 0.781    | 1.270    | 0.787    |
| HDL cholesterol   |        |                    |                         |          |          |          |          |          |          |          |
| GWAS threshold    | 85     | 5.9                | 1.114                   | 0.898    | 1.246    | 0.803    | 1.217    | 0.822    | 1.210    | 0.826    |
| Steiger filter 1  | 77     | 5.0                | 1.124                   | 0.890    | 1.268    | 0.789    | 1.237    | 0.808    | 1.230    | 0.813    |
| Steiger filter 2  | 50     | 4.2                | 1.136                   | 0.880    | 1.292    | 0.774    | 1.258    | 0.795    | 1.250    | 0.800    |
| GWAS restricted   | 50     | 1.9                | 1.205                   | 0.830    | 1.440    | 0.694    | 1.390    | 0.719    | 1.375    | 0.727    |
| Triglycerides     |        |                    |                         |          |          |          |          |          |          |          |
| GWAS threshold    | 51     | 4.6                | 1.129                   | 0.886    | 1.279    | 0.782    | 1.248    | 0.801    | 1.240    | 0.806    |
| Steiger filter 1  | 39     | 4.0                | 1.139                   | 0.878    | 1.300    | 0.769    | 1.265    | 0.791    | 1.255    | 0.797    |
| Steiger filter 2  | 21     | 3.2                | 1.156                   | 0.865    | 1.338    | 0.747    | 1.298    | 0.770    | 1.290    | 0.775    |
| GWAS restricted   | 16     | 1.2                | 1.262                   | 0.792    | 1.555    | 0.643    | 1.490    | 0.671    | 1.475    | 0.678    |

\* Includes all SNPs that associates with a trait and have a  $p < 5 \times 10^{-8}$

† Includes all SNPs with  $r^2$  values with their traits higher than the other 2 traits

‡ Includes all SNPs with  $r^2$  values with their traits higher and the difference is significant ( $p < 0.05$ ) compared to each of the other 2 traits

§ Includes that associates with a trait and have a  $p < 5 \times 10^{-8}$  and don't associate with any of the other 2 traits  $p > 5 \times 10^{-8}$

GWAS, Genome-Wide Association Study; IS, Ischemic Stroke; SAO, Small Artery Occlusion Stroke; CE, Cardio-Embolic Stroke

**Supplemental Table IV. Sensitivity Mendelian Randomization Analyses of LDL cholesterol with Ischemic Stroke and Subtypes**

| Trait | Instrument                  | N  | Variance | Method          | OR    | 95% CI      |             | p      | p-intercept |
|-------|-----------------------------|----|----------|-----------------|-------|-------------|-------------|--------|-------------|
|       |                             |    |          |                 |       | lower limit | upper limit |        |             |
| IS    | GWAS threshold*             | 75 | 6.4      | Conventional MR | 1.122 | 1.015       | 1.240       | 0.0245 | 0.143       |
|       |                             |    |          | MR-Egger        | 1.224 | 1.050       | 1.427       | 0.0098 |             |
|       | GWAS threshold (MRPRESSO)   | 73 | 6.4      | Conventional MR | 1.143 | 1.056       | 1.237       | 0.0009 | 0.519       |
|       |                             |    |          | MR-Egger        | 1.179 | 1.043       | 1.333       | 0.0085 |             |
|       | Steiger filter 1†           | 67 | 5.9      | Conventional MR | 1.164 | 1.067       | 1.269       | 0.0006 | 0.466       |
|       |                             |    |          | MR-Egger        | 1.207 | 1.059       | 1.376       | 0.0048 |             |
|       | Steiger filter 1 (MRPRESSO) | 66 | 5.9      | Conventional MR | 1.173 | 1.084       | 1.270       | 0.0001 | 0.693       |
|       |                             |    |          | MR-Egger        | 1.195 | 1.060       | 1.347       | 0.0036 |             |
|       | Steiger filter 2‡           | 61 | 5.6      | Conventional MR | 1.158 | 1.061       | 1.265       | 0.0010 | 0.412       |
|       |                             |    |          | MR-Egger        | 1.206 | 1.058       | 1.375       | 0.0050 |             |
|       | Steiger filter 2 (MRPRESSO) | 60 | 5.6      | Conventional MR | 1.168 | 1.079       | 1.264       | 0.0001 | 0.638       |
|       |                             |    |          | MR-Egger        | 1.193 | 1.059       | 1.343       | 0.0036 |             |
|       | GWAS restricted§            | 56 | 3.6      | Conventional MR | 1.186 | 1.053       | 1.337       | 0.0050 | 0.134       |
|       |                             |    |          | MR-Egger        | 1.363 | 1.098       | 1.693       | 0.0051 |             |
|       | GWAS restricted (MRPRESSO)  | 55 | 3.6      | Conventional MR | 1.204 | 1.081       | 1.340       | 0.0007 | 0.218       |
|       |                             |    |          | MR-Egger        | 1.335 | 1.097       | 1.625       | 0.0039 |             |
| LAA   | GWAS threshold              | 75 | 6.4      | Conventional MR | 1.277 | 1.068       | 1.527       | 0.0070 | 0.393       |
|       |                             |    |          | MR-Egger        | 1.405 | 1.060       | 1.862       | 0.0180 |             |
|       | Steiger filter 1            | 67 | 5.9      | Conventional MR | 1.360 | 1.134       | 1.631       | 0.0010 | 0.544       |
|       |                             |    |          | MR-Egger        | 1.452 | 1.098       | 1.920       | 0.009  |             |
|       | Steiger filter 2            | 61 | 5.6      | Conventional MR | 1.324 | 1.101       | 1.591       | 0.003  | 0.355       |
|       |                             |    |          | MR-Egger        | 1.462 | 1.105       | 1.933       | 0.008  |             |

|     |                            |    |     |                 |       |       |       |       |       |
|-----|----------------------------|----|-----|-----------------|-------|-------|-------|-------|-------|
|     | GWAS restricted            | 56 | 3.6 | Conventional MR | 1.350 | 1.067 | 1.709 | 0.012 |       |
|     |                            |    |     | MR-Egger        | 1.558 | 1.005 | 2.416 | 0.047 | 0.447 |
| SAO | GWAS threshold             | 75 | 6.4 | Conventional MR | 1.090 | 0.925 | 1.284 | 0.303 |       |
|     |                            |    |     | MR-Egger        | 1.211 | 0.940 | 1.559 | 0.138 | 0.285 |
|     | GWAS threshold(MRPRESSO)   | 74 | 6.4 | Conventional MR | 1.109 | 0.960 | 1.281 | 0.161 |       |
|     |                            |    |     | MR-Egger        | 1.164 | 0.930 | 1.456 | 0.185 | 0.581 |
|     | Steiger filter 1           | 67 | 5.9 | Conventional MR | 1.136 | 0.978 | 1.319 | 0.096 |       |
|     |                            |    |     | MR-Egger        | 1.203 | 0.960 | 1.506 | 0.108 | 0.502 |
|     | Steiger filter 2           | 61 | 5.6 | Conventional MR | 1.149 | 0.987 | 1.337 | 0.074 |       |
|     |                            |    |     | MR-Egger        | 1.194 | 0.951 | 1.498 | 0.126 | 0.653 |
|     | GWAS restricted            | 56 | 3.6 | Conventional MR | 1.216 | 0.992 | 1.490 | 0.060 |       |
|     |                            |    |     | MR-Egger        | 1.438 | 0.991 | 2.087 | 0.056 | 0.291 |
|     | GWAS restricted (MRPRESSO) | 55 | 3.6 | Conventional MR | 1.243 | 1.030 | 1.502 | 0.024 |       |
|     |                            |    |     | MR-Egger        | 1.393 | 0.985 | 1.969 | 0.061 | 0.443 |
| CE  | GWAS threshold             | 75 | 6.4 | Conventional MR | 0.986 | 0.838 | 1.161 | 0.866 |       |
|     |                            |    |     | MR-Egger        | 1.160 | 0.904 | 1.490 | 0.244 | 0.095 |
|     | Steiger filter1            | 67 | 5.9 | Conventional MR | 1.001 | 0.842 | 1.190 | 0.995 |       |
|     |                            |    |     | MR-Egger        | 1.122 | 0.865 | 1.456 | 0.384 | 0.247 |
|     | Steiger filter 2           | 61 | 5.6 | Conventional MR | 1.000 | 0.837 | 1.195 | 0.999 |       |
|     |                            |    |     | MR-Egger        | 1.135 | 0.871 | 1.478 | 0.349 | 0.208 |
|     | GWAS restricted            | 56 | 3.6 | Conventional MR | 1.020 | 0.802 | 1.296 | 0.874 |       |
|     |                            |    |     | MR-Egger        | 1.437 | 0.931 | 2.217 | 0.101 | 0.065 |

\* Includes all SNPs that associates with a trait and have a  $p < 5 \times 10^{-8}$

† Includes all SNPs with  $r^2$  values with their traits higher than the other 2 traits

‡ Includes all SNPs with  $r^2$  values with their traits higher and the difference is significant ( $p < 0.05$ ) compared to each of the other 2 traits

§ Includes that associates with a trait and have a  $p < 5 \times 10^{-8}$  and don't associate with any of the other 2 traits  $p > 5 \times 10^{-8}$

GWAS, Genome-Wide Association Study; IS, Ischemic Stroke; SAO, Small Artery Occlusion Stroke; CE, Cardio-Embollic Stroke

**Supplemental Table V. Sensitivity Mendelian randomization analyses of HDL cholesterol with ischemic stroke and subtypes.**

| Trait | Instrument                  | N  | Variance | Method          | OR    | 95% CI      |             | p      | p-intercept |
|-------|-----------------------------|----|----------|-----------------|-------|-------------|-------------|--------|-------------|
|       |                             |    |          |                 |       | lower limit | upper limit |        |             |
| IS    | GWAS threshold*             | 85 | 5.9      | Conventional MR | 0.915 | 0.831       | 1.007       | 0.0706 |             |
|       |                             |    |          | MR-Egger        | 1.013 | 0.869       | 1.181       | 0.8672 | 0.096       |
|       | GWAS threshold (MRPRESSO)   | 84 | 5.9      | Conventional MR | 0.930 | 0.857       | 1.008       | 0.0776 |             |
|       |                             |    |          | MR-Egger        | 0.994 | 0.874       | 1.132       | 0.9334 | 0.192       |
|       | Steiger filter 1†           | 77 | 5.0      | Conventional MR | 0.896 | 0.807       | 0.994       | 0.0388 |             |
|       |                             |    |          | MR-Egger        | 0.993 | 0.844       | 1.169       | 0.9325 | 0.110       |
|       | Steiger filter 1 (MRPRESSO) | 76 | 4.9      | Conventional MR | 0.913 | 0.838       | 0.995       | 0.0372 |             |
|       |                             |    |          | MR-Egger        | 0.976 | 0.853       | 1.117       | 0.7217 | 0.210       |
|       | Steiger filter 2‡           | 50 | 4.2      | Conventional MR | 0.905 | 0.822       | 0.998       | 0.0447 |             |
|       |                             |    |          | MR-Egger        | 0.954 | 0.822       | 1.108       | 0.5389 | 0.365       |
|       | GWAS restricted§            | 50 | 1.9      | Conventional MR | 0.931 | 0.812       | 1.067       | 0.3053 |             |
|       |                             |    |          | MR-Egger        | 1.182 | 0.917       | 1.522       | 0.1962 | 0.031       |
| LAA   | GWAS threshold              | 85 | 5.9      | Conventional MR | 0.925 | 0.745       | 1.148       | 0.480  |             |
|       |                             |    |          | MR-Egger        | 1.240 | 0.878       | 1.751       | 0.221  | 0.035       |
|       | Steiger filter 1            | 77 | 5.0      | Conventional MR | 0.865 | 0.688       | 1.089       | 0.218  |             |
|       |                             |    |          | MR-Egger        | 1.217 | 0.850       | 1.741       | 0.283  | 0.017       |
|       | Steiger filter 2            | 50 | 4.2      | Conventional MR | 0.967 | 0.783       | 1.196       | 0.760  |             |
|       |                             |    |          | MR-Egger        | 1.063 | 0.762       | 1.482       | 0.720  | 0.471       |
|       | GWAS restricted             | 50 | 1.9      | Conventional MR | 0.988 | 0.690       | 1.413       | 0.947  |             |
|       |                             |    |          | MR-Egger        | 2.060 | 0.991       | 4.283       | 0.053  | 0.026       |
|       | GWAS restricted (MRPRESSO)  | 48 | 1.9      | Conventional MR | 1.090 | 0.799       | 1.487       | 0.586  |             |
|       |                             |    |          | MR-Egger        | 1.830 | 0.965       | 3.473       | 0.064  | 0.072       |

|     |                             |    |     |                 |       |       |       |       |       |
|-----|-----------------------------|----|-----|-----------------|-------|-------|-------|-------|-------|
| SAO | GWAS threshold              | 85 | 5.9 | Conventional MR | 0.788 | 0.670 | 0.927 | 0.004 | 0.330 |
|     |                             |    |     | MR-Egger        | 0.868 | 0.674 | 1.119 | 0.276 |       |
|     | GWAS threshold (MRPRESSO)   | 84 | 5.9 | Conventional MR | 0.806 | 0.698 | 0.931 | 0.003 | 0.577 |
|     |                             |    |     | MR-Egger        | 0.847 | 0.675 | 1.061 | 0.149 |       |
|     | Steiger filter 1            | 77 | 5.0 | Conventional MR | 0.803 | 0.678 | 0.952 | 0.011 | 0.385 |
|     |                             |    |     | MR-Egger        | 0.876 | 0.676 | 1.136 | 0.320 |       |
|     | Steiger filter 1 (MRPRESSO) | 76 | 4.9 | Conventional MR | 0.824 | 0.707 | 0.961 | 0.014 | 0.679 |
|     |                             |    |     | MR-Egger        | 0.856 | 0.677 | 1.082 | 0.193 |       |
|     | Steiger filter 2            | 50 | 4.2 | Conventional MR | 0.807 | 0.685 | 0.951 | 0.010 | 0.422 |
|     |                             |    |     | MR-Egger        | 0.869 | 0.680 | 1.111 | 0.263 |       |
|     | GWAS restricted             | 50 | 1.9 | Conventional MR | 0.824 | 0.652 | 1.043 | 0.107 | 0.427 |
|     |                             |    |     | MR-Egger        | 0.939 | 0.630 | 1.400 | 0.759 |       |
| CE  | GWAS threshold              | 85 | 5.9 | Conventional MR | 0.901 | 0.782 | 1.038 | 0.150 | 0.612 |
|     |                             |    |     | MR-Egger        | 0.945 | 0.749 | 1.194 | 0.637 |       |
|     | Steiger filter 1            | 77 | 5.0 | Conventional MR | 0.901 | 0.772 | 1.052 | 0.186 | 0.766 |
|     |                             |    |     | MR-Egger        | 0.875 | 0.681 | 1.123 | 0.294 |       |
|     | Steiger filter 2            | 50 | 4.2 | Conventional MR | 0.892 | 0.749 | 1.062 | 0.201 | 0.672 |
|     |                             |    |     | MR-Egger        | 0.852 | 0.645 | 1.125 | 0.258 |       |
|     | GWAS restricted             | 50 | 1.9 | Conventional MR | 0.991 | 0.772 | 1.273 | 0.946 | 0.332 |
|     |                             |    |     | MR-Egger        | 1.267 | 0.727 | 2.208 | 0.403 |       |

\* Includes all SNPs that associates with a trait and have a  $p < 5 \times 10^{-8}$

† Includes all SNPs with  $r^2$  values with their traits higher than the other 2 traits

‡ Includes all SNPs with  $r^2$  values with their traits higher and the difference is significant ( $p < 0.05$ ) compared to each of the other 2 traits

§ Includes that associates with a trait and have a  $p < 5 \times 10^{-8}$  and don't associate with any of the other 2 traits  $p > 5 \times 10^{-8}$

GWAS, Genome-Wide Association Study; IS, Ischemic Stroke; SAO, Small Artery Occlusion Stroke; CE, Cardio-Embolic Stroke



**Supplemental Table VI. Sensitivity Mendelian randomization analyses of triglycerides with ischemic stroke and subtypes.**

| Trait | Instrument        | N  | Variance | Method          | OR    | 95% CI      |             | p     | p-intercept |
|-------|-------------------|----|----------|-----------------|-------|-------------|-------------|-------|-------------|
|       |                   |    |          |                 |       | lower limit | upper limit |       |             |
| IS    | GWAS threshold*   | 51 | 4.6      | Conventional MR | 0.978 | 0.887       | 1.079       | 0.659 | 0.921       |
|       |                   |    |          | MR-Egger        | 0.972 | 0.824       | 1.146       | 0.733 |             |
|       | Steiger filter 1† | 39 | 4.0      | Conventional MR | 1.039 | 0.940       | 1.149       | 0.452 | 0.253       |
|       |                   |    |          | MR-Egger        | 0.967 | 0.824       | 1.134       | 0.676 |             |
|       | Steiger filter 2‡ | 21 | 3.2      | Conventional MR | 0.995 | 0.888       | 1.114       | 0.926 | 0.666       |
|       |                   |    |          | MR-Egger        | 1.028 | 0.853       | 1.238       | 0.775 |             |
|       | GWAS restricted§  | 16 | 1.2      | Conventional MR | 1.054 | 0.875       | 1.270       | 0.580 | 0.792       |
|       |                   |    |          | MR-Egger        | 1.016 | 0.732       | 1.411       | 0.923 |             |
| LAA   | GWAS threshold    | 51 | 4.6      | Conventional MR | 0.991 | 0.782       | 1.254       | 0.938 | 0.021       |
|       |                   |    |          | MR-Egger        | 0.693 | 0.475       | 1.011       | 0.057 |             |
|       | Steiger filter 1  | 39 | 4.0      | Conventional MR | 0.996 | 0.800       | 1.240       | 0.971 | 0.094       |
|       |                   |    |          | MR-Egger        | 0.789 | 0.557       | 1.119       | 0.184 |             |
|       | Steiger filter 2  | 21 | 3.2      | Conventional MR | 0.916 | 0.716       | 1.172       | 0.486 | 0.693       |
|       |                   |    |          | MR-Egger        | 0.978 | 0.651       | 1.468       | 0.914 |             |
|       | GWAS restricted   | 16 | 1.2      | Conventional MR | 1.239 | 0.826       | 1.857       | 0.300 | 0.420       |
|       |                   |    |          | MR-Egger        | 0.974 | 0.479       | 1.983       | 0.943 |             |
| SAO   | GWAS threshold    | 51 | 4.6      | Conventional MR | 1.024 | 0.856       | 1.224       | 0.794 | 0.401       |
|       |                   |    |          | MR-Egger        | 1.134 | 0.842       | 1.526       | 0.408 |             |
|       | Steiger filter 1  | 39 | 4.0      | Conventional MR | 1.052 | 0.869       | 1.275       | 0.602 | 0.525       |
|       |                   |    |          | MR-Egger        | 1.137 | 0.838       | 1.543       | 0.411 |             |
|       | Steiger filter 2  | 21 | 3.2      | Conventional MR | 1.019 | 0.807       | 1.288       | 0.872 | 0.151       |
|       |                   |    |          | MR-Egger        | 1.268 | 0.871       | 1.845       | 0.215 |             |

|    |                  |    |     |                 |       |       |       |       |       |
|----|------------------|----|-----|-----------------|-------|-------|-------|-------|-------|
|    | GWAS restricted  | 16 | 1.2 | Conventional MR | 0.900 | 0.627 | 1.291 | 0.566 |       |
|    |                  |    |     | MR-Egger        | 1.194 | 0.633 | 2.250 | 0.585 | 0.288 |
| CE | GWAS threshold   | 51 | 4.6 | Conventional MR | 1.017 | 0.857 | 1.207 | 0.846 |       |
|    |                  |    |     | MR-Egger        | 1.128 | 0.848 | 1.501 | 0.408 | 0.374 |
|    | Steiger filter 1 | 39 | 4.0 | Conventional MR | 1.062 | 0.857 | 1.315 | 0.584 |       |
|    |                  |    |     | MR-Egger        | 1.053 | 0.746 | 1.487 | 0.769 | 0.953 |
|    | Steiger filter 2 | 21 | 3.2 | Conventional MR | 1.032 | 0.838 | 1.269 | 0.769 |       |
|    |                  |    |     | MR-Egger        | 1.016 | 0.723 | 1.428 | 0.925 | 0.915 |
|    | GWAS restricted  | 16 | 1.2 | Conventional MR | 0.904 | 0.605 | 1.350 | 0.622 |       |
|    |                  |    |     | MR-Egger        | 1.141 | 0.558 | 2.330 | 0.718 | 0.438 |

\* Includes all SNPs that associates with a trait and have a  $p < 5 \times 10^{-8}$

† Includes all SNPs with  $r^2$  values with their traits higher than the other 2 traits

‡ Includes all SNPs with  $r^2$  values with their traits higher and the difference is significant ( $p < 0.05$ ) compared to each of the other 2 traits

§ Includes that associates with a trait and have a  $p < 5 \times 10^{-8}$  and don't associate with any of the other 2 traits  $p > 5 \times 10^{-8}$

GWAS, Genome-Wide Association Study; IS, Ischemic Stroke; SAO, Small Artery Occlusion Stroke; CE, Cardio-Embolic Stroke

**Supplemental Figure I. Mendelian Randomization analysis using SNPs in genes encoding targets of LDLC lowering or HDLC raising drugs**

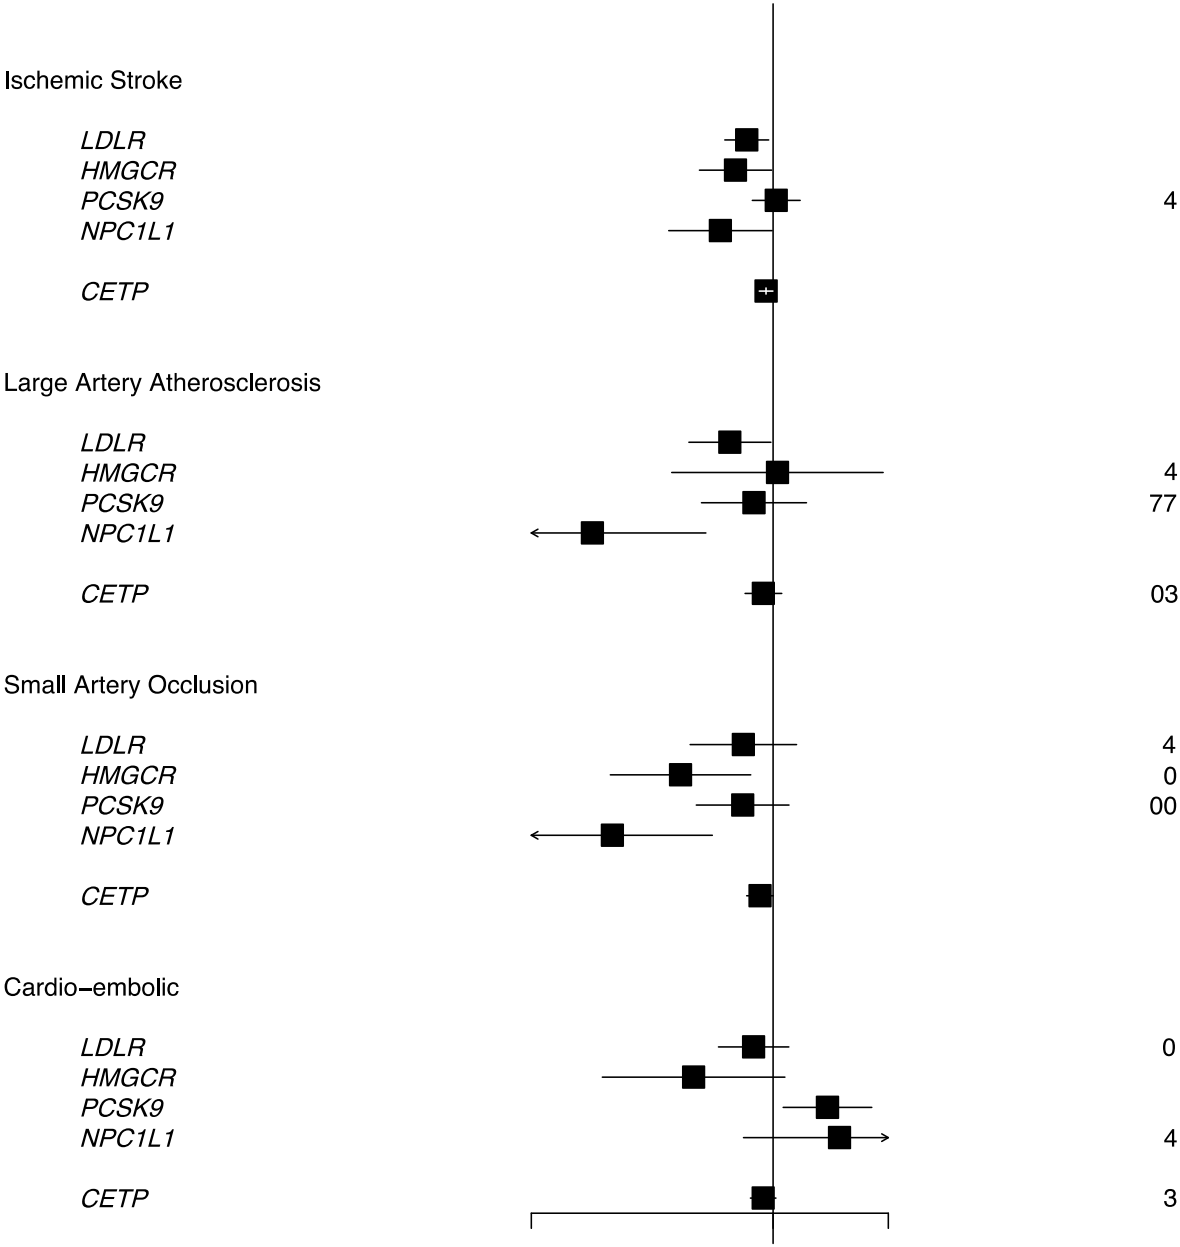

Association per 1 mmol/L lower LDLC instrumented by variants in the *LDLR*, *HMGCR*, *PCSK9* and *NPC1L1* genes or 1 mmol/L higher HDLC instrumented by variants in the *CETP* gene with ischemic stroke subtypes.

## **Members of the Stroke Genetics Network (SiGN)**

### Administrative:

Steven J. Kittner, MD, MPH (chair; Department of Neurology, University of Maryland School of Medicine and Veterans Affairs Maryland Health Care System, Baltimore, MD, USA);  
Cameron A. Dell, BS (Department of Neurology, University of Maryland School of Medicine, Baltimore, MD, USA);  
Dale M. Gamble, MHSc, CCRP (Department of Neurology, Mayo Clinic, Jacksonville, FL, USA);  
Mary J. Sparks, RN, BSN (Department of Neurology, University of Maryland School of Medicine, Baltimore, MD, USA)

### Steering/PIs of Discovery Studies:

Donna K. Arnett, PhD, MSPH (Department of Epidemiology, School of Public Health, University of Alabama at Birmingham, Birmingham, AL, USA);  
Oscar Benavente, MD, FRCP (Department of Neurology, University of British Columbia, Vancouver, British Columbia, Canada);  
John W. Cole, MD, MS (Department of Neurology, University of Maryland School of Medicine and Veterans Affairs Maryland Health Care System, Baltimore, MD, USA);  
Martin Dichgans, MD (Institute for Stroke and Dementia Research, Klinikum der Universität München, Ludwig-Maximilians University, Munich, Germany; Munich Cluster for Systems Neurology (SyNergy), Munich, Germany);  
Raji P. Grewal, MD (Neuroscience Institute, Saint Francis Medical Center, School of Health and Medical Sciences, Seton Hall University, South Orange, New Jersey, USA);  
Christina Jern, MD, PhD (Institute of Biomedicine, the Sahlgrenska Academy at University of Gothenburg, Gothenburg, Sweden);  
Jordi Jiménez Conde, MD, PhD (Department of Neurology, Neurovascular Research Group (NEUVAS) IMIM-Hospital del Mar (Institut Hospital del Mar d'Investigacions Mèdiques), Universitat Autònoma de Barcelona/DCEXS-Universitat Pompeu Fabra, Barcelona, Spain);  
Julie A. Johnson, PharmD (Department of Pharmacotherapy and Translational Research and Center for Pharmacogenomics, College of Pharmacy, University of Florida, Gainesville, FL, USA; Division of Cardiovascular Medicine, College of Medicine, University of Florida, Gainesville, FL, USA);  
Jin-Moo Lee, MD, PhD (Stroke Center, Department of Neurology, Washington University School of Medicine, St. Louis, MO, USA);  
Christopher Levi, MBBS, BMed Sci, FRACP (John Hunter Hospital, Hunter Medical Research Institute and University of Newcastle, NSW, Australia);  
Arne Lindgren, MD PhD (Department of Clinical Sciences Lund, Neurology, Lund University, Lund, Sweden; Department of Neurology and Rehabilitation Medicine, Neurology, Skåne, University Hospital, Lund, Sweden);  
Hugh S. Markus, DM (Department of Clinical Neurosciences, University of Cambridge, Cambridge, UK);  
Olle Melander, MD, PhD (Lund University, Department of Clinical Sciences, Malmö University Hospital, Malmö, Sweden);  
James F. Meschia, MD (Department of Neurology, Mayo Clinic, Jacksonville, FL, USA);  
Kathryn Rexrode, MD, MPH (Brigham and Women's Hospital, Boston, MA, USA);  
Jonathan Rosand, MD, MSc (Program in Medical and Population Genetics, Broad Institute of MIT and Harvard, Cambridge MA, USA; Department of Neurology and Center for Human Genetic Research, Massachusetts General Hospital, Boston, MA, USA; Department of Neurology, Harvard Medical School, Boston, MA, USA);

Peter M. Rothwell, FMedSci (Stroke Prevention Research Unit, Nuffield Department of Clinical Neurosciences, University of Oxford, John Radcliffe Hospital, Oxford, UK);  
Tatjana Rundek, MD, PhD, FANA (Department of Neurology, Miller School of Medicine, University of Miami, Miami, FL, USA);  
Ralph L. Sacco, MD, MS, FAHA, FAAN, FANA (Department of Neurology, Miller School of Medicine, University of Miami, Miami, FL, USA);  
Reinhold Schmidt, MD (Department of Neurology, Clinical Division of Neurogeriatrics, Medical University Graz, Graz, Austria);  
Pankaj Sharma, MD, PhD, FRCP (Institute of Cardiovascular Research, Royal Holloway University of London (ICR2UL), Egham, UK; St Peter's and Ashford Hospitals, UK);  
Agnieszka Slowik, MD, PhD (Department of Neurology, Jagiellonian University Medical College, Krakow, Poland);  
Cathie LM Sudlow, DPhil, FRCP(E) (Centre for Clinical Brain Sciences & Institute of Genomic and Molecular Medicine, University of Edinburgh, UK);  
Vincent Thijs, MD, PhD (KU Leuven - University of Leuven, Department of Neurosciences, Experimental Neurology and Leuven Research Institute for Neuroscience and Disease (LIND), Leuven, Belgium; VIB, Vesalius Research Center, Laboratory of Neurobiology, Leuven, Belgium; University Hospitals Leuven, Department of Neurology, Leuven, Belgium);  
Sylvia Wassertheil-Smoller, PhD (Department of Epidemiology and Population Health, Albert Einstein College of Medicine, Bronx, NY, USA);  
Daniel Woo, MD, MS (University of Cincinnati College of Medicine, Cincinnati, OH, USA);  
Bradford B. Worrall, MD, MSc (Departments of Neurology and Public Health Sciences, University of Virginia, Charlottesville, VA, USA)

#### PIs of Control Studies:

Rebecca D. Jackson, MD (Division of Endocrinology, Diabetes and Metabolism, Department of Internal Medicine and the Center for Clinical and Translational Science, The Ohio State University, Columbus, OH);  
Martina Müller-Nurasyid, PhD (Institute of Genetic Epidemiology, Helmholtz Zentrum München – Germany; Research Center for Environmental Health, Neuherberg, Germany; Department of Medicine I, Ludwig-Maximilians-University Munich, Munich, Germany; DZHK (German Centre for Cardiovascular Research), partner site Munich; Heart Alliance, Munich, Germany);  
Mike A. Nalls, PhD (Laboratory of Neurogenetics, National Institute on Aging, National Institutes of Health, Bethesda, MD, USA);  
Marta Ribasés, PhD, BSc (Psychiatric Genetics Unit, Group of Psychiatry, Mental Health and Addictions, Vall d'Hebron Research Institute (VHIR), Universitat Autònoma de Barcelona, Barcelona, Spain; Department of Psychiatry, Hospital Universitari Vall d'Hebron, Barcelona, Spain; Biomedical Network Research Centre on Mental Health (CIBERSAM), Barcelona, Spain);  
David R. Weir, PhD (Survey Research Center, University of Michigan, Ann Arbor, MI, USA)

#### Data Management:

Patrick F. McArdle, PhD (chair; Department of Medicine and Program for Personalized and Genomic Medicine, University of Maryland School of Medicine, Baltimore, MD);  
Tushar Dave, MS (Department of Medicine and Program for Personalized and Genomic Medicine, University of Maryland School of Medicine, Baltimore, MD, USA)

#### Analysis:

Braxton D. Mitchell, PhD, MPH (chair; Division of Endocrinology, Diabetes and Nutrition, University of Maryland School of Medicine, Baltimore, MD, USA; Geriatric Research and Education Clinical Center, Veterans Administration Medical Center, Baltimore, MD, USA);

Yu-Ching Cheng, PhD (Department of Medicine, University of Maryland School of Medicine, Baltimore, MD, USA);

Paul I.W. de Bakker, PhD (Department of Medical Genetics, University Medical Center Utrecht, Utrecht, The Netherlands; Department of Epidemiology, University Medical Center Utrecht, Utrecht, The Netherlands);

Myriam Fornage, PhD (Institute of Molecular Medicine, University of Texas Health Science Center at Houston, Houston, TX, USA);

Cathy C. Laurie, PhD (Department of Biostatistics, University of Washington, Seattle, WA, USA);

Ani Manichaikul, PhD (Center for Public Health Genomics, Biostatistics Section, Department for Public Health Sciences, University of Virginia, Charlottesville, VA, USA);

Jeffrey R. O'Connell, DPhil (Division of Endocrinology, Diabetes and Nutrition, University of Maryland School of Medicine, Baltimore, MD, USA);

Sara L. Pulit, BA (Department of Medical Genetics, Institute for Molecular Medicine, University Medical Center Utrecht, Utrecht, The Netherlands);

Stephen S. Rich, PhD (Center for Public Health Genomics, University of Virginia, Charlottesville, VA, USA);

Quenna Wong, MS (Department of Biostatistics, University of Washington, Seattle, WA, USA);

Huichun Xu, MD, PhD (Department of Medicine, University of Maryland School of Medicine, Baltimore, MD, USA)

#### Phenotype:

James F. Meschia, MD (co-chair; Department of Neurology, Mayo Clinic, Jacksonville, FL, USA);

Bradford B. Worrall, MD, MSc (co-chair; Departments of Neurology and Public Health Sciences, University of Virginia, Charlottesville, VA, USA);

Hakan Ay, MD (AA Martinos Center for Biomedical Imaging, Department of Radiology, Massachusetts General Hospital, Harvard Medical School, Boston, MA, USA; Stroke Service, Department of Neurology, Massachusetts General Hospital, Harvard Medical School, Boston, MA, USA);

Robert D. Brown Jr., MD, MPH (Department of Neurology, Mayo Clinic, Rochester, MN, USA)

#### Imaging:

Jonathan Rosand, MD, MSc (chair; Program in Medical and Population Genetics, Broad Institute of MIT and Harvard, Cambridge MA, USA; Department of Neurology and Center for Human Genetic Research, Massachusetts General Hospital, Boston, MA, USA; Department of Neurology, Harvard Medical School, Boston, MA, USA);

Natalia S. Rost, MD, MPH (Stroke Division, Department of Neurology, Massachusetts General Hospital, Harvard Medical School, Boston, MA 02114);

Ona Wu, PhD (Athinoula A. Martinos Center for Biomedical Imaging, Department of Radiology, Massachusetts General Hospital, Charlestown, MA, USA; Department of Radiology, Harvard Medical School, Boston, MA, USA)

#### Publication:

Kathryn Rexrode, MD, MPH (chair Brigham and Women's Hospital, Boston, MA, USA);

Tatjana Rundek, MD, PhD, FANA (prior chair; Department of Neurology, Miller School of Medicine, University of Miami, Miami, FL, USA);

Agnieszka Slowik, MD, PhD (prior co-chair; Department of Neurology, Jagiellonian University Medical College, Krakow, Poland);

Hakan Ay, MD (AA Martinos Center for Biomedical Imaging, Department of Radiology, Massachusetts General Hospital, Harvard Medical School, Boston, MA, USA; Stroke Service, Department of Neurology, Massachusetts General Hospital, Harvard Medical School, Boston, MA, USA);

Oscar R. Benavente, MD, FRCP (Department of Neurology, University of British Columbia, Vancouver, British Columbia, Canada);

Steve Bevan, PhD (Department of Clinical Neurosciences, University of Cambridge, Cambridge, UK);

Katrina Gwinn, MD (National Institute of Neurological Disorders and Stroke, National Institutes of Health, Bethesda, MD, USA);

Steven J. Kittner, MD, MPH (chair; Department of Neurology, University of Maryland School of Medicine and Veterans Affairs Maryland Health Care System, Baltimore, MD, USA);

Jin-Moo Lee, MD, PhD (Stroke Center, Department of Neurology, Washington University School of

Medicine, St. Louis, MO, USA);

Patrick F. McArdle, PhD (Department of Medicine and Program for Personalized and Genomic Medicine, University of Maryland School of Medicine, Baltimore, MD);

James F. Meschia, MD (Department of Neurology, Mayo Clinic, Jacksonville, FL, USA);

Braxton D. Mitchell, PhD, MPH (Division of Endocrinology, Diabetes and Nutrition, University of Maryland School of Medicine, Baltimore, MD, USA; Geriatric Research and Education Clinical Center, Veterans Administration Medical Center, Baltimore, MD, USA);

Jonathan Rosand, MD, MSc (Program in Medical and Population Genetics, Broad Institute of MIT and Harvard, Cambridge MA, USA; Department of Neurology and Center for Human Genetic Research,

Massachusetts General Hospital, Boston, MA, USA; Department of Neurology, Harvard Medical School, Boston, MA, USA);

Sylvia Wassertheil-Smoller, PhD (Department of Epidemiology and Population Health, Albert Einstein College of Medicine, Bronx, NY, USA);

Daniel Woo, MD, MS (University of Cincinnati College of Medicine, Cincinnati, OH, USA);

Bradford B. Worrall, MD, MSc (Departments of Neurology and Public Health Sciences, University of Virginia, Charlottesville, VA, USA)

#### CIDR:

Kimberly F. Doheny, PhD (Center for Inherited Disease Research, Institute of Genetic Medicine, Johns Hopkins School of Medicine, Baltimore, MD)

#### NINDS staff:

Roderick Corriveau, PhD (National Institutes of Health, Bethesda, MD, USA);

Katrina Gwinn, MD (National Institute of Neurological Disorders and Stroke, National Institutes of Health, Bethesda, MD, USA)

## References

1. Willer CJ, Schmidt EM, Sengupta S, Peloso GM, Gustafsson S, et al; Global Lipids Genetics Consortium. Discovery and refinement of loci associated with lipid levels. *Nat Genet.* 2013;45:1274-1283
2. NINDS Stroke Genetics Network (SiGN), International Stroke Genetics Consortium (ISGC). Loci associated with ischaemic stroke and its subtypes (SiGN): A genome-wide association study. *Lancet Neurol.* 2016;15:174-184
